# Supplementary material
Source: publisher figshare collection journal article supplement (https://rs.figshare.com/ndownloader/files/17842781)
Supplement: Supplementary file 1 [file 17842781]

40	0.9	0.1	1	1	0.03	0.04	0.4	0.1	10	1	687.02	0.00034
40	0.9	0.4	1	1	0.03	0.04	0.4	0	10	1	757.27	0.00071
40	0.9	0.2	1	1	0.03	0.04	0.4	0.6	10	1	733.2	0.00065
40	0.9	0.2	1	1	0.03	0.04	0.4	0.7	10	1	744.5	0.00068
40	0.9	0.3	1	1	0.03	0.04	0.4	0.6	10	1	756.97	0.00049
40	0.9	0.01	1	1	0.03	0.04	0.4	0.5	10	1	708.69	0.00055
40	0.9	0.6	1	1	0.03	0.04	0.4	0.6	10	1	852.56	0.00146
40	0.9	0.7	1	1	0.03	0.04	0.4	0.5	10	1	915.9	0.00237
40	0.8	0.7	1	1	0.03	0.04	0.4	0	10	1	616.49	0.0109
40	0.8	0.4	1	1	0.03	0.04	0.4	0.2	10	1	499.94	0.00331
40	0.8	0.3	1	1	0.03	0.04	0.4	0.8	10	1	491.83	0.00296
40	0.8	0.2	1	1	0.03	0.04	0.4	0.4	10	1	469.93	0.00275
40	0.8	0.5	1	1	0.03	0.04	0.4	0.2	10	1	526.62	0.00462
40	0.8	0.1	1	1	0.03	0.04	0.4	0.1	10	1	463.88	0.00196
40	0.8	0.2	1	1	0.03	0.04	0.4	0.2	10	1	475.51	0.00222
40	0.9	0.01	1	1	0.03	0.04	0.4	0	10	1	679.54	0.00029
40	0.8	0.2	1	1	0.03	0.04	0.4	0.9	10	1	480.84	0.00276
40	0.8	0.3	1	1	0.03	0.04	0.4	0.9	10	1	495.41	0.00326
40	0.8	0.1	1	1	0.03	0.04	0.4	0.2	10	1	466.73	0.00214
40	0.8	0.3	1	1	0.03	0.04	0.4	0.6	10	1	484.69	0.00262
40	0.9	0.4	1	1	0.03	0.04	0.4	0.4	10	1	775.7	0.00068
40	0.8	0.3	1	1	0.03	0.04	0.4	0.1	10	1	477.85	0.00237
40	0.8	0.1	1	1	0.03	0.04	0.4	0.3	10	1	463.77	0.00242
40	0.8	0.6	1	1	0.03	0.04	0.4	0.9	10	1	563.3	0.00727
40	0.8	0.1	1	1	0.03	0.04	0.4	0	10	1	465.17	0.00199
40	0.8	0.3	1	1	0.03	0.04	0.4	0.5	10	1	488.03	0.00293
40	0.8	0.01	1	1	0.03	0.04	0.4	0.5	10	1	458.15	0.00244
40	0.8	0.2	1	1	0.03	0.04	0.4	0.8	10	1	477.79	0.00272
40	0.8	0.5	1	1	0.03	0.04	0.4	0.1	10	1	524.59	0.00404
40	0.8	0.3	1	1	0.03	0.04	0.4	0.7	10	1	486.04	0.00324
40	0.8	0.5	1	1	0.03	0.04	0.4	0	10	1	522.68	0.00415
40	0.8	0.7	1	1	0.03	0.04	0.4	0.5	10	1	614.43	0.01187
40	0.8	0.3	1	1	0.03	0.04	0.4	0.2	10	1	481.2	0.00274
40	0.9	0.1	1	1	0.03	0.04	0.4	0.2	10	1	694.84	0.0004
40	0.9	0.5	1	1	0.03	0.04	0.4	0	10	1	788.96	0.00063
40	0.7	0.7	1	1	0.03	0.04	0.4	0.9	10	1	512.68	0.02451
40	0.8	0.4	1	1	0.03	0.04	0.4	0	10	1	502.46	0.00283
40	0.7	0.7	1	1	0.03	0.04	0.4	0.8	10	1	515.63	0.02504
40	0.7	0.6	1	1	0.03	0.04	0.4	0.6	10	1	454.14	0.01565
40	0.9	0.1	1	1	0.03	0.04	0.4	0.3	10	1	698.26	0.00041
40	0.9	0.3	1	1	0.03	0.04	0.4	0.2	10	1	737.26	0.00045
40	0.9	0.4	1	1	0.03	0.04	0.4	0.7	10	1	775.76	0.00073
40	0.9	0.01	1	1	0.03	0.04	0.4	0.6	10	1	710.13	0.00052
40	0.9	0.6	1	1	0.03	0.04	0.4	0	10	1	823.52	0.00078
40	0.9	0.01	1	1	0.03	0.04	0.4	0.3	10	1	688.81	0.0003
40	0.9	0.2	1	1	0.03	0.04	0.4	0.3	10	1	712.82	0.00049
40	0.9	0.01	1	1	0.03	0.04	0.4	0.7	10	1	708.08	0.00071
40	0.9	0.1	1	1	0.03	0.04	0.4	0	10	1	691.58	0.00031
40	0.9	0.1	1	1	0.03	0.04	0.4	0.8	10	1	731.86	0.00075
40	0.9	0.1	1	1	0.03	0.04	0.4	0.6	10	1	725.86	0.00072
40	0.7	0.8	1	1	0.03	0.04	0.4	0.1	10	1	653.62	0.04782
40	0.9	0.4	1	1	0.03	0.04	0.4	0.5	10	1	775	0.00075
40	0.9	0.3	1	1	0.03	0.04	0.4	0.9	10	1	772.99	0.00103
40	0.9	0.3	1	1	0.03	0.04	0.4	0.7	10	1	756.97	0.00082
40	0.9	0.6	1	1	0.03	0.04	0.4	0.5	10	1	849.57	0.00116
40	0.8	0.4	1	1	0.03	0.04	0.4	0.3	10	1	505.33	0.00339
40	0.9	0.4	1	1	0.03	0.04	0.4	0.8	10	1	787.69	0.00095
40	0.9	0.3	1	1	0.03	0.04	0.4	0.8	10	1	770.95	0.00077
40	0.8	0.4	1	1	0.03	0.04	0.4	0.9	10	1	508.4	0.00366
40	0.9	0.2	1	1	0.03	0.04	0.4	0.8	10	1	746.69	0.00061
40	0.8	0.4	1	1	0.03	0.04	0.4	0.1	10	1	503.62	0.003
40	0.8	0.4	1	1	0.03	0.04	0.4	0.4	10	1	499.81	0.0033
40	0.7	0.2	1	1	0.03	0.04	0.4	0.3	10	1	372.38	0.00629
40	0.7	0.5	1	1	0.03	0.04	0.4	0.2	10	1	420.84	0.0114
40	0.7	0.1	1	1	0.03	0.04	0.4	0	10	1	364.98	0.00617
40	0.8	0.2	1	1	0.03	0.04	0.4	0.7	10	1	473.89	0.00255
40	0.7	0.5	1	1	0.03	0.04	0.4	0.8	10	1	424.93	0.01113
40	0.9	0.7	1	1	0.03	0.04	0.4	0.1	10	1	905.53	0.0021
40	0.7	0.4	1	1	0.03	0.04	0.4	0.3	10	1	398.93	0.00963
40	0.7	0.6	1	1	0.03	0.04	0.4	0.2	10	1	458.28	0.01542
40	0.7	0.3	1	1	0.03	0.04	0.4	0.1	10	1	380.77	0.00728
40	0.9	0.6	1	1	0.03	0.04	0.4	0.2	10	1	840.46	0.0012
40	0.9	0.5	1	1	0.03	0.04	0.4	0.7	10	1	815.07	0.00098
40	0.7	0.6	1	1	0.03	0.04	0.4	0.3	10	1	461.81	0.01617
40	0.7	0.5	1	1	0.03	0.04	0.4	0.5	10	1	418.05	0.01084
40	0.7	0.1	1	1	0.03	0.04	0.4	0.9	10	1	368.79	0.00621
40	0.7	0.7	1	1	0.03	0.04	0.4	0	10	1	520.87	0.02566
40	0.9	0.7	1	1	0.03	0.04	0.4	0.4	10	1	915.83	0.00253
40	0.7	0.6	1	1	0.03	0.04	0.4	0.7	10	1	450.5	0.01528
40	0.9	0.6	1	1	0.03	0.04	0.4	0.3	10	1	832.35	0.00126
40	0.9	0.6	1	1	0.03	0.04	0.4	0.7	10	1	859.63	0.00157
40	0.9	0.6	1	1	0.03	0.04	0.4	0.4	10	1	844.78	0.00118
40	0.7	0.5	1	1	0.03	0.04	0.4	0.6	10	1	418.77	0.011
40	0.7	0.4	1	1	0.03	0.04	0.4	0	10	1	399.12	0.00894
40	0.7	0.7	1	1	0.03	0.04	0.4	0.6	10	1	521.13	0.02546
40	0.7	0.6	1	1	0.03	0.04	0.4	0.5	10	1	461.25	0.01544
40	0.9	0.7	1	1	0.03	0.04	0.4	0.9	10	1	937.21	0.00321
40	0.9	0.01	1	1	0.03	0.04	0.4	0.2	10	1	683.62	0.00036
40	0.7	0.7	1	1	0.03	0.04	0.4	0.7	10	1	518.16	0.02473
40	0.7	0.6	1	1	0.03	0.04	0.4	0.8	10	1	450.12	0.01611
40	0.7	0.4	1	1	0.03	0.04	0.4	0.2	10	1	400.7	0.00871
40	0.9	0.8	1	1	0.03	0.04	0.4	0.4	10	1	1026.3	0.00667
40	0.8	0.5	1	1	0.03	0.04	0.4	0.9	10	1	531.41	0.00441
40	0.7	0.2	1	1	0.03	0.04	0.4	0	10	1	373.61	0.00652
40	0.9	0.8	1	1	0.03	0.04	0.4	0.6	10	1	1023.9	0.00646
40	0.7	0.4	1	1	0.03	0.04	0.4	0.1	10	1	395.5	0.00894
40	0.7	0.2	1	1	0.03	0.04	0.4	0.2	10	1	374.28	0.00651
40	0.7	0.3	1	1	0.03	0.04	0.4	0.9	10	1	383.45	0.00758
40	0.7	0.2	1	1	0.03	0.04	0.4	0.4	10	1	374.74	0.00646
40	0.7	0.1	1	1	0.03	0.04	0.4	0.6	10	1	363.52	0.00607
40	0.9	0.8	1	1	0.03	0.04	0.4	0.9	10	1	1054.2	0.00784
40	0.7	0.2	1	1	0.03	0.04	0.4	0.8	10	1	375.84	0.00628
40	0.9	0.8	1	1	0.03	0.04	0.4	0.7	10	1	1040.4	0.00713
40	0.7	0.3	1	1	0.03	0.04	0.4	0.6	10	1	390.67	0.00778
40	0.7	0.8	1	1	0.03	0.04	0.4	0.9	10	1	632.71	0.04416
40	0.8	0.6	1	1	0.03	0.04	0.4	0	10	1	558.01	0.00654
40	0.7	0.4	1	1	0.03	0.04	0.4	0.6	10	1	403.78	0.00922
40	0.7	0.1	1	1	0.03	0.04	0.4	0.4	10	1	366.85	0.00596
40	0.9	0.8	1	1	0.03	0.04	0.4	0.3	10	1	1032.2	0.00576
40	0.8	0.8	1	1	0.03	0.04	0.4	0.9	10	1	731.87	0.02469
40	0.8	0.9	1	1	0.03	0.04	0.4	0.4	10	1	1032.4	0.06052
40	0.8	0.9	1	1	0.03	0.04	0.4	0.3	10	1	1045.6	0.06179
40	0.7	0.1	1	1	0.03	0.04	0.4	0.7	10	1	370.62	0.0064
40	0.9	0.9	1	1	0.03	0.04	0.4	0.8	10	1	1287.7	0.02555
40	0.8	0.7	1	1	0.03	0.04	0.4	0.3	10	1	624.76	0.01149
40	0.9	0.9	1	1	0.03	0.04	0.4	0.4	10	1	1285.8	0.02504
40	0.7	0.01	1	1	0.03	0.04	0.4	0.4	10	1	353.21	0.00504
40	0.7	0.4	1	1	0.03	0.04	0.4	0.9	10	1	401	0.00911
40	0.7	0.3	1	1	0.03	0.04	0.4	0	10	1	384.26	0.0073
40	0.7	0.3	1	1	0.03	0.04	0.4	0.4	10	1	386.2	0.00739
40	0.7	0.3	1	1	0.03	0.04	0.4	0.3	10	1	382.98	0.00715
40	0.7	0.1	1	1	0.03	0.04	0.4	0.3	10	1	367.24	0.00625
40	0.8	0.9	1	1	0.03	0.04	0.4	0.9	10	1	1000.9	0.05575
40	0.7	0.1	1	1	0.03	0.04	0.4	0.2	10	1	367.26	0.0056
40	0.7	0.01	1	1	0.03	0.04	0.4	0.7	10	1	358.57	0.00543
40	0.8	0.9	1	1	0.03	0.04	0.4	0	10	1	1064.7	0.06591
40	0.8	0.4	1	1	0.03	0.04	0.4	0.8	10	1	505.9	0.00341
40	0.7	0.01	1	1	0.03	0.04	0.4	0.9	10	1	362.3	0.00559
40	0.7	0.6	1	1	0.03	0.04	0.4	0	10	1	457.02	0.01585
40	0.7	0.6	1	1	0.03	0.04	0.4	0.4	10	1	454.39	0.01493
40	0.7	0.01	1	1	0.03	0.04	0.4	0.3	10	1	356.51	0.00565
40	0.8	0.9	1	1	0.03	0.04	0.4	0.1	10	1	1078.1	0.06664
40	0.9	0.2	1	1	0.03	0.04	0.4	0.5	10	1	731.75	0.00054
40	0.8	0.8	1	1	0.03	0.04	0.4	0.6	10	1	743.35	0.02551
40	0.8	0.8	1	1	0.03	0.04	0.4	0.5	10	1	740.76	0.0252
40	0.7	0.01	1	1	0.03	0.04	0.4	0.2	10	1	363.02	0.00565
40	0.7	0.7	1	1	0.03	0.04	0.4	0.1	10	1	521.08	0.02586
40	0.7	0.01	1	1	0.03	0.04	0.4	0.8	10	1	359.66	0.00559
40	0.9	0.2	1	1	0.03	0.04	0.4	0.1	10	1	714.41	0.00032
40	0.8	0.01	1	1	0.03	0.04	0.4	0.1	10	1	449.1	0.00171
40	0.9	0.3	1	1	0.03	0.04	0.4	0.3	10	1	747.86	0.00063
40	0.6	0.2	1	1	0.03	0.04	0.4	0.2	10	1	313.89	0.01161
40	0.6	0.3	1	1	0.03	0.04	0.4	0.6	10	1	325.66	0.01309
40	0.8	0.2	1	1	0.03	0.04	0.4	0.5	10	1	472.45	0.00258
40	0.6	0.3	1	1	0.03	0.04	0.4	0.4	10	1	330.82	0.01306
40	0.6	0.2	1	1	0.03	0.04	0.4	0	10	1	319.41	0.01152
40	0.8	0.2	1	1	0.03	0.04	0.4	0.1	10	1	473.6	0.00229
40	0.8	0.2	1	1	0.03	0.04	0.4	0.3	10	1	473.49	0.00248
40	0.6	0.3	1	1	0.03	0.04	0.4	0.7	10	1	329.22	0.01305
40	0.8	0.2	1	1	0.03	0.04	0.4	0.6	10	1	471.69	0.00261
40	0.7	0.4	1	1	0.03	0.04	0.4	0.8	10	1	404.15	0.00902
40	0.8	0.1	1	1	0.03	0.04	0.4	0.7	10	1	463.56	0.0023
40	0.6	0.1	1	1	0.03	0.04	0.4	0.8	10	1	308.71	0.01039
40	0.8	0.01	1	1	0.03	0.04	0.4	0.2	10	1	446.88	0.00174
40	0.8	0.01	1	1	0.03	0.04	0.4	0	10	1	453.08	0.00204
40	0.8	0.1	1	1	0.03	0.04	0.4	0.4	10	1	459.57	0.0025
40	0.6	0.5	1	1	0.03	0.04	0.4	0	10	1	360.51	0.0183
40	0.6	0.1	1	1	0.03	0.04	0.4	0.4	10	1	307.06	0.01006
40	0.9	0.8	1	1	0.03	0.04	0.4	0.8	10	1	1040.8	0.00769
40	0.6	0.3	1	1	0.03	0.04	0.4	0.8	10	1	325.19	0.01313
40	0.8	0.01	1	1	0.03	0.04	0.4	0.6	10	1	459.99	0.00203
40	0.7	0.1	1	1	0.03	0.04	0.4	0.8	10	1	369.19	0.00628
40	0.9	0.3	1	1	0.03	0.04	0.4	0.5	10	1	753.3	0.00057
40	0.6	0.01	1	1	0.03	0.04	0.4	0.6	10	1	304.93	0.00969
40	0.6	0.4	1	1	0.03	0.04	0.4	0.3	10	1	337.96	0.01492
40	0.8	0.2	1	1	0.03	0.04	0.4	0	10	1	471.47	0.00226
40	0.8	0.4	1	1	0.03	0.04	0.4	0.5	10	1	504.6	0.00322
40	0.8	0.01	1	1	0.03	0.04	0.4	0.9	10	1	467.82	0.00203
40	0.8	0.3	1	1	0.03	0.04	0.4	0	10	1	482.86	0.00275
40	0.6	0.7	1	1	0.03	0.04	0.4	0.2	10	1	457.24	0.03766
40	0.6	0.5	1	1	0.03	0.04	0.4	0.1	10	1	365.41	0.01838
40	0.6	0.7	1	1	0.03	0.04	0.4	0.9	10	1	455.37	0.03696
40	0.7	0.9	1	1	0.03	0.04	0.4	0.8	10	1	927.22	0.08237
40	0.6	0.4	1	1	0.03	0.04	0.4	0.4	10	1	342.39	0.01597
40	0.8	0.1	1	1	0.03	0.04	0.4	0.6	10	1	469.33	0.00255
40	0.7	0.8	1	1	0.03	0.04	0.4	0.7	10	1	638.54	0.04474
40	0.8	0.5	1	1	0.03	0.04	0.4	0.3	10	1	526.68	0.00442
40	0.8	0.1	1	1	0.03	0.04	0.4	0.5	10	1	471.52	0.00242
40	0.8	0.01	1	1	0.03	0.04	0.4	0.3	10	1	451.1	0.0023
40	0.9	0.2	1	1	0.03	0.04	0.4	0.4	10	1	734.33	0.00058
40	0.7	0.9	1	1	0.03	0.04	0.4	0.9	10	1	911.1	0.07972
40	0.8	0.5	1	1	0.03	0.04	0.4	0.7	10	1	525.58	0.00432
40	0.6	0.01	1	1	0.03	0.04	0.4	0.8	10	1	304.76	0.00995
40	0.6	0.4	1	1	0.03	0.04	0.4	0	10	1	342.82	0.01526
40	0.6	0.2	1	1	0.03	0.04	0.4	0.3	10	1	316.5	0.01143
40	0.6	0.2	1	1	0.03	0.04	0.4	0.4	10	1	317.86	0.0109
40	0.6	0.4	1	1	0.03	0.04	0.4	0.7	10	1	342.81	0.01511
40	0.8	0.5	1	1	0.03	0.04	0.4	0.8	10	1	527.54	0.00515
40	0.8	0.8	1	1	0.03	0.04	0.4	0.2	10	1	743.83	0.02536
40	0.8	0.01	1	1	0.03	0.04	0.4	0.4	10	1	462.15	0.00241
40	0.8	0.3	1	1	0.03	0.04	0.4	0.4	10	1	485.14	0.00289
40	0.8	0.3	1	1	0.03	0.04	0.4	0.3	10	1	487.59	0.0027
40	0.6	0.3	1	1	0.03	0.04	0.4	0.9	10	1	327.14	0.01248
40	0.8	0.4	1	1	0.03	0.04	0.4	0.6	10	1	503.54	0.00359
40	0.6	0.1	1	1	0.03	0.04	0.4	0	10	1	308.27	0.00997
40	0.8	0.01	1	1	0.03	0.04	0.4	0.7	10	1	461.18	0.0023
40	0.8	0.5	1	1	0.03	0.04	0.4	0.6	10	1	521.85	0.00466
40	0.6	0.4	1	1	0.03	0.04	0.4	0.9	10	1	337.82	0.01515
40	0.6	0.1	1	1	0.03	0.04	0.4	0.1	10	1	305.93	0.01003
40	0.6	0.5	1	1	0.03	0.04	0.4	0.6	10	1	363.33	0.0186
40	0.8	0.01	1	1	0.03	0.04	0.4	0.8	10	1	460.04	0.00231
40	0.6	0.3	1	1	0.03	0.04	0.4	0.1	10	1	325.45	0.01321
40	0.6	0.2	1	1	0.03	0.04	0.4	0.1	10	1	317.64	0.01119
40	0.8	0.1	1	1	0.03	0.04	0.4	0.8	10	1	470.87	0.0024
40	0.6	0.1	1	1	0.03	0.04	0.4	0.5	10	1	310.38	0.01054
40	0.8	0.1	1	1	0.03	0.04	0.4	0.9	10	1	471.5	0.00245
40	0.8	0.8	1	1	0.03	0.04	0.4	0.7	10	1	731.58	0.0246
40	0.8	0.6	1	1	0.03	0.04	0.4	0.1	10	1	556.4	0.00632
40	0.6	0.5	1	1	0.03	0.04	0.4	0.4	10	1	365.17	0.01829
40	0.7	0.9	1	1	0.03	0.04	0.4	0.6	10	1	945.54	0.08515
40	0.6	0.8	1	1	0.03	0.04	0.4	0.4	10	1	599.22	0.06352
40	0.8	0.4	1	1	0.03	0.04	0.4	0.7	10	1	510.22	0.00356
40	0.8	0.5	1	1	0.03	0.04	0.4	0.4	10	1	519.88	0.00413
40	0.6	0.1	1	1	0.03	0.04	0.4	0.2	10	1	313.71	0.01045
40	0.6	0.01	1	1	0.03	0.04	0.4	0.1	10	1	302.69	0.00982
40	0.7	0.5	1	1	0.03	0.04	0.4	0.1	10	1	422.47	0.01097
40	0.8	0.5	1	1	0.03	0.04	0.4	0.5	10	1	527.26	0.00467
40	0.6	0.2	1	1	0.03	0.04	0.4	0.8	10	1	317.43	0.01137
40	0.6	0.01	1	1	0.03	0.04	0.4	0	10	1	303.85	0.00937
40	0.6	0.1	1	1	0.03	0.04	0.4	0.9	10	1	309.89	0.01069
40	0.7	0.9	1	1	0.03	0.04	0.4	0.7	10	1	931.38	0.08389
40	0.7	0.4	1	1	0.03	0.04	0.4	0.7	10	1	397.56	0.00881
40	0.6	0.01	1	1	0.03	0.04	0.4	0.5	10	1	304.24	0.00966
40	0.6	0.6	1	1	0.03	0.04	0.4	0.5	10	1	399.07	0.02531
40	0.6	0.7	1	1	0.03	0.04	0.4	0.3	10	1	462.8	0.03696
40	0.6	0.01	1	1	0.03	0.04	0.4	0.3	10	1	303.47	0.00974
40	0.6	0.5	1	1	0.03	0.04	0.4	0.5	10	1	361.69	0.01847
40	0.9	0.01	1	1	0.03	0.04	0.4	0.8	10	1	717.1	0.00072
40	0.6	0.1	1	1	0.03	0.04	0.4	0.7	10	1	308.88	0.01088
40	0.7	0.2	1	1	0.03	0.04	0.4	0.6	10	1	373.03	0.0066
40	0.8	0.6	1	1	0.03	0.04	0.4	0.5	10	1	560.04	0.00671
40	0.6	0.7	1	1	0.03	0.04	0.4	0.8	10	1	465.71	0.03692
40	0.7	0.5	1	1	0.03	0.04	0.4	0	10	1	417.84	0.01091
40	0.8	0.6	1	1	0.03	0.04	0.4	0.3	10	1	557.36	0.00638
40	0.8	0.6	1	1	0.03	0.04	0.4	0.4	10	1	561.27	0.00692
40	0.7	0.9	1	1	0.03	0.04	0.4	0.2	10	1	975.62	0.09203
40	0.9	0.7	1	1	0.03	0.04	0.4	0.6	10	1	920.07	0.00267
40	0.7	0.5	1	1	0.03	0.04	0.4	0.4	10	1	425.4	0.01125
40	0.8	0.6	1	1	0.03	0.04	0.4	0.6	10	1	563.75	0.00668
40	0.7	0.7	1	1	0.03	0.04	0.4	0.4	10	1	517.11	0.02495
40	0.8	0.6	1	1	0.03	0.04	0.4	0.2	10	1	557.85	0.00608
40	0.7	0.4	1	1	0.03	0.04	0.4	0.4	10	1	401	0.0088
40	0.7	0.3	1	1	0.03	0.04	0.4	0.2	10	1	382.41	0.007
40	0.8	0.7	1	1	0.03	0.04	0.4	0.1	10	1	611.28	0.0109
40	0.7	0.2	1	1	0.03	0.04	0.4	0.1	10	1	373.81	0.00641
40	0.8	0.6	1	1	0.03	0.04	0.4	0.7	10	1	562.06	0.00705
40	0.7	0.6	1	1	0.03	0.04	0.4	0.1	10	1	454.18	0.01502
40	0.8	0.6	1	1	0.03	0.04	0.4	0.8	10	1	561.88	0.0067
40	0.5	0.1	1	1	0.03	0.04	0.4	0.6	10	1	270.28	0.01467
40	0.5	0.01	1	1	0.03	0.04	0.4	0.1	10	1	263.38	0.01303
40	0.8	0.8	1	1	0.03	0.04	0.4	0.4	10	1	737.25	0.02458
40	0.9	0.6	1	1	0.03	0.04	0.4	0.1	10	1	832.98	0.00105
40	0.7	0.3	1	1	0.03	0.04	0.4	0.5	10	1	381.12	0.00748
40	0.5	0.1	1	1	0.03	0.04	0.4	0.8	10	1	268.68	0.01447
40	0.7	0.1	1	1	0.03	0.04	0.4	0.5	10	1	363.86	0.00604
40	0.9	0.7	1	1	0.03	0.04	0.4	0.2	10	1	902.62	0.0022
40	0.5	0.6	1	1	0.03	0.04	0.4	0.5	10	1	354.06	0.03229
40	0.9	0.4	1	1	0.03	0.04	0.4	0.3	10	1	759.75	0.00068
40	0.7	0.01	1	1	0.03	0.04	0.4	0.5	10	1	360.57	0.005
40	0.7	0.5	1	1	0.03	0.04	0.4	0.3	10	1	422.49	0.01084
40	0.9	0.9	1	1	0.03	0.04	0.4	0.9	10	1	1264.1	0.02428
40	0.6	0.8	1	1	0.03	0.04	0.4	0.6	10	1	577.27	0.0611
40	0.7	0.1	1	1	0.03	0.04	0.4	0.1	10	1	366.8	0.00539
40	0.8	0.7	1	1	0.03	0.04	0.4	0.4	10	1	626.29	0.01141
40	0.7	0.9	1	1	0.03	0.04	0.4	0.4	10	1	945.84	0.08644
40	0.6	0.7	1	1	0.03	0.04	0.4	0.4	10	1	458.36	0.03716
40	0.5	0.3	1	1	0.03	0.04	0.4	0.6	10	1	286.59	0.01726
40	0.7	0.5	1	1	0.03	0.04	0.4	0.7	10	1	417.61	0.01118
40	0.7	0.2	1	1	0.03	0.04	0.4	0.5	10	1	374.26	0.0063
40	0.7	0.3	1	1	0.03	0.04	0.4	0.8	10	1	392.31	0.00783
40	0.6	0.8	1	1	0.03	0.04	0.4	0	10	1	587.65	0.06167
40	0.6	0.8	1	1	0.03	0.04	0.4	0.2	10	1	591.86	0.06318
40	0.7	0.01	1	1	0.03	0.04	0.4	0.6	10	1	359.79	0.00565
40	0.5	0.4	1	1	0.03	0.04	0.4	0.1	10	1	299.58	0.01984
40	0.7	0.3	1	1	0.03	0.04	0.4	0.7	10	1	385.26	0.00746
40	0.9	0.8	1	1	0.03	0.04	0.4	0	10	1	1005.7	0.0053
40	0.7	0.2	1	1	0.03	0.04	0.4	0.9	10	1	377.44	0.00671
40	0.5	0.4	1	1	0.03	0.04	0.4	0.2	10	1	303.49	0.0214
40	0.5	0.4	1	1	0.03	0.04	0.4	0.5	10	1	301.65	0.01987
40	0.6	0.8	1	1	0.03	0.04	0.4	0.8	10	1	583.73	0.06017
40	0.7	0.01	1	1	0.03	0.04	0.4	0	10	1	357.32	0.00522
40	0.5	0.3	1	1	0.03	0.04	0.4	0	10	1	286.71	0.01822
40	0.6	0.8	1	1	0.03	0.04	0.4	0.1	10	1	590.84	0.06348
40	0.5	0.3	1	1	0.03	0.04	0.4	0.5	10	1	289.44	0.01838
40	0.7	0.6	1	1	0.03	0.04	0.4	0.9	10	1	452.82	0.01519
40	0.7	0.5	1	1	0.03	0.04	0.4	0.9	10	1	422.01	0.01128
40	0.5	0.4	1	1	0.03	0.04	0.4	0.6	10	1	301.58	0.02075
40	0.5	0.5	1	1	0.03	0.04	0.4	0.4	10	1	326.27	0.02557
40	0.5	0.2	1	1	0.03	0.04	0.4	0.8	10	1	277.96	0.01641
40	0.7	0.2	1	1	0.03	0.04	0.4	0.7	10	1	376.64	0.00664
40	0.8	0.7	1	1	0.03	0.04	0.4	0.7	10	1	616.48	0.01093
40	0.5	0.3	1	1	0.03	0.04	0.4	0.3	10	1	288.05	0.01775
40	0.5	0.3	1	1	0.03	0.04	0.4	0.2	10	1	290.01	0.01764
40	0.5	0.2	1	1	0.03	0.04	0.4	0.9	10	1	276.28	0.01524
40	0.5	0.5	1	1	0.03	0.04	0.4	0	10	1	324.36	0.02499
40	0.8	0.7	1	1	0.03	0.04	0.4	0.2	10	1	617.07	0.01088
40	0.5	0.1	1	1	0.03	0.04	0.4	0.7	10	1	270.27	0.01435
40	0.5	0.01	1	1	0.03	0.04	0.4	0.2	10	1	262.66	0.01341
40	0.8	0.8	1	1	0.03	0.04	0.4	0.8	10	1	725.28	0.02457
40	0.6	0.8	1	1	0.03	0.04	0.4	0.5	10	1	583.94	0.06168
40	0.5	0.6	1	1	0.03	0.04	0.4	0.3	10	1	363.5	0.0338
40	0.6	0.3	1	1	0.03	0.04	0.4	0.5	10	1	331.38	0.01277
40	0.8	0.7	1	1	0.03	0.04	0.4	0.6	10	1	622.39	0.01179
40	0.5	0.3	1	1	0.03	0.04	0.4	0.4	10	1	288.47	0.01742
40	0.5	0.2	1	1	0.03	0.04	0.4	0.3	10	1	279.18	0.01572
40	0.5	0.01	1	1	0.03	0.04	0.4	0.4	10	1	261.35	0.0135
40	0.5	0.5	1	1	0.03	0.04	0.4	0.1	10	1	328.49	0.02534
40	0.6	0.8	1	1	0.03	0.04	0.4	0.7	10	1	587.65	0.06194
40	0.5	0.6	1	1	0.03	0.04	0.4	0.6	10	1	362.67	0.03289
40	0.5	0.6	1	1	0.03	0.04	0.4	0.4	10	1	362.45	0.03331
40	0.8	0.8	1	1	0.03	0.04	0.4	0	10	1	742.33	0.02522
40	0.7	0.01	1	1	0.03	0.04	0.4	0.1	10	1	358.26	0.00522
40	0.5	0.2	1	1	0.03	0.04	0.4	0	10	1	276.72	0.01563
40	0.6	0.9	1	1	0.03	0.04	0.4	0.1	10	1	929.96	0.11192
40	0.7	0.7	1	1	0.03	0.04	0.4	0.5	10	1	525.84	0.02553
40	0.5	0.6	1	1	0.03	0.04	0.4	0.2	10	1	356.31	0.03291
40	0.6	0.9	1	1	0.03	0.04	0.4	0.8	10	1	882.2	0.09749
40	0.5	0.6	1	1	0.03	0.04	0.4	0.9	10	1	357.18	0.03235
40	0.5	0.7	1	1	0.03	0.04	0.4	0	10	1	422.93	0.04703
40	0.7	0.8	1	1	0.03	0.04	0.4	0.4	10	1	647.01	0.04633
40	0.5	0.1	1	1	0.03	0.04	0.4	0.9	10	1	266.95	0.01396
40	0.5	0.7	1	1	0.03	0.04	0.4	0.3	10	1	426.59	0.04752
40	0.5	0.7	1	1	0.03	0.04	0.4	0.4	10	1	419.71	0.04561
40	0.6	0.6	1	1	0.03	0.04	0.4	0.4	10	1	399.59	0.02517
40	0.5	0.01	1	1	0.03	0.04	0.4	0.9	10	1	263.77	0.01362
40	0.5	0.7	1	1	0.03	0.04	0.4	0.1	10	1	426.44	0.04741
40	0.5	0.01	1	1	0.03	0.04	0.4	0.8	10	1	262.43	0.01295
40	0.6	0.9	1	1	0.03	0.04	0.4	0	10	1	930.3	0.11394
40	0.5	0.7	1	1	0.03	0.04	0.4	0.6	10	1	422.27	0.04604
40	0.5	0.01	1	1	0.03	0.04	0.4	0.3	10	1	263.34	0.0137
40	0.6	0.01	1	1	0.03	0.04	0.4	0.2	10	1	302.98	0.00951
40	0.5	0.6	1	1	0.03	0.04	0.4	0.7	10	1	356.31	0.03201
40	0.5	0.01	1	1	0.03	0.04	0.4	0.7	10	1	264.04	0.01394
40	0.6	0.4	1	1	0.03	0.04	0.4	0.8	10	1	340.44	0.01468
40	0.4	0.1	1	1	0.03	0.04	0.4	0.4	10	1	240.87	0.01775
40	0.5	0.7	1	1	0.03	0.04	0.4	0.2	10	1	425.94	0.04723
40	0.4	0.1	1	1	0.03	0.04	0.4	0.6	10	1	243.38	0.01784
40	0.4	0.01	1	1	0.03	0.04	0.4	0.2	10	1	236.29	0.01629
40	0.9	0.2	1	1	0.03	0.04	0.4	0	10	1	709.53	0.00031
40	0.4	0.6	1	1	0.03	0.04	0.4	0.1	10	1	330.7	0.03774
40	0.4	0.5	1	1	0.03	0.04	0.4	0	10	1	294.95	0.0307
40	0.8	0.7	1	1	0.03	0.04	0.4	0.8	10	1	610.68	0.01186
40	0.9	0.2	1	1	0.03	0.04	0.4	0.2	10	1	721.39	0.00043
40	0.9	0.1	1	1	0.03	0.04	0.4	0.4	10	1	715.87	0.0006
40	0.6	0.4	1	1	0.03	0.04	0.4	0.1	10	1	339.36	0.01454
40	0.4	0.6	1	1	0.03	0.04	0.4	0	10	1	325.97	0.03796
40	0.9	0.3	1	1	0.03	0.04	0.4	0.1	10	1	734.63	0.00039
40	0.6	0.4	1	1	0.03	0.04	0.4	0.2	10	1	343.95	0.01537
40	0.4	0.5	1	1	0.03	0.04	0.4	0.2	10	1	295.86	0.03055
40	0.9	0.1	1	1	0.03	0.04	0.4	0.5	10	1	720.14	0.0006
40	0.4	0.5	1	1	0.03	0.04	0.4	0.5	10	1	297.11	0.0309
40	0.5	0.6	1	1	0.03	0.04	0.4	0.8	10	1	355.24	0.0329
40	0.7	0.4	1	1	0.03	0.04	0.4	0.5	10	1	401.97	0.00936
40	0.4	0.1	1	1	0.03	0.04	0.4	0	10	1	241.42	0.01853
40	0.6	0.01	1	1	0.03	0.04	0.4	0.4	10	1	303.04	0.00928
40	0.8	0.8	1	1	0.03	0.04	0.4	0.3	10	1	749.81	0.02598
40	0.8	0.8	1	1	0.03	0.04	0.4	0.1	10	1	741.77	0.02478
40	0.4	0.2	1	1	0.03	0.04	0.4	0.1	10	1	248.18	0.01917
40	0.9	0.8	1	1	0.03	0.04	0.4	0.2	10	1	1030.8	0.00561
40	0.4	0.2	1	1	0.03	0.04	0.4	0.8	10	1	250.81	0.01941
40	0.9	0.4	1	1	0.03	0.04	0.4	0.2	10	1	765.33	0.00067
40	0.6	0.3	1	1	0.03	0.04	0.4	0	10	1	330.45	0.01283
40	0.4	0.01	1	1	0.03	0.04	0.4	0.3	10	1	236.18	0.01627
40	0.6	0.2	1	1	0.03	0.04	0.4	0.9	10	1	317.75	0.0111
40	0.7	0.7	1	1	0.03	0.04	0.4	0.3	10	1	521.55	0.02538
40	0.4	0.4	1	1	0.03	0.04	0.4	0.2	10	1	273.69	0.02566
40	0.6	0.6	1	1	0.03	0.04	0.4	0.1	10	1	399.07	0.02473
40	0.6	0.4	1	1	0.03	0.04	0.4	0.6	10	1	336.58	0.01494
40	0.4	0.2	1	1	0.03	0.04	0.4	0.3	10	1	247.84	0.01891
40	0.4	0.3	1	1	0.03	0.04	0.4	0.3	10	1	256.57	0.02163
40	0.4	0.4	1	1	0.03	0.04	0.4	0.4	10	1	271.41	0.02499
40	0.4	0.1	1	1	0.03	0.04	0.4	0.5	10	1	237.04	0.01771
40	0.4	0.3	1	1	0.03	0.04	0.4	0.7	10	1	253.77	0.02077
40	0.6	0.2	1	1	0.03	0.04	0.4	0.5	10	1	322.67	0.01145
40	0.4	0.7	1	1	0.03	0.04	0.4	0.1	10	1	399.15	0.05472
40	0.4	0.2	1	1	0.03	0.04	0.4	0.9	10	1	250.3	0.02058
40	0.7	0.7	1	1	0.03	0.04	0.4	0.2	10	1	526.92	0.0256
40	0.6	0.1	1	1	0.03	0.04	0.4	0.3	10	1	308.53	0.01049
40	0.9	0.3	1	1	0.03	0.04	0.4	0.4	10	1	744.27	0.00049
40	0.4	0.1	1	1	0.03	0.04	0.4	0.9	10	1	241.94	0.01766
40	0.4	0.3	1	1	0.03	0.04	0.4	0.4	10	1	255	0.02182
40	0.8	0.7	1	1	0.03	0.04	0.4	0.9	10	1	634.12	0.01217
40	0.9	0.1	1	1	0.03	0.04	0.4	0.9	10	1	740.78	0.00097
40	0.4	0.3	1	1	0.03	0.04	0.4	0.9	10	1	257.03	0.02139
40	0.6	0.01	1	1	0.03	0.04	0.4	0.9	10	1	302.95	0.0098
40	0.9	0.3	1	1	0.03	0.04	0.4	0	10	1	728.03	0.00038
40	0.6	0.4	1	1	0.03	0.04	0.4	0.5	10	1	346.19	0.01536
40	0.9	0.01	1	1	0.03	0.04	0.4	0.9	10	1	724.51	0.00082
40	0.6	0.1	1	1	0.03	0.04	0.4	0.6	10	1	309.51	0.01059
40	0.6	0.2	1	1	0.03	0.04	0.4	0.7	10	1	317.48	0.01198
40	0.6	0.3	1	1	0.03	0.04	0.4	0.2	10	1	328.29	0.01297
40	0.4	0.01	1	1	0.03	0.04	0.4	0.8	10	1	234.12	0.01648
40	0.6	0.6	1	1	0.03	0.04	0.4	0	10	1	393.49	0.02472
40	0.6	0.5	1	1	0.03	0.04	0.4	0.8	10	1	362.76	0.01847
40	0.5	0.1	1	1	0.03	0.04	0.4	0.5	10	1	268.22	0.01366
40	0.5	0.8	1	1	0.03	0.04	0.4	0.4	10	1	549.47	0.07395
40	0.6	0.3	1	1	0.03	0.04	0.4	0.3	10	1	332.65	0.0133
40	0.7	0.8	1	1	0.03	0.04	0.4	0.2	10	1	646.2	0.04656
40	0.9	0.4	1	1	0.03	0.04	0.4	0.1	10	1	758.75	0.00052
40	0.6	0.5	1	1	0.03	0.04	0.4	0.7	10	1	362.63	0.0186
40	0.4	0.5	1	1	0.03	0.04	0.4	0.3	10	1	292.91	0.03085
40	0.9	0.01	1	1	0.03	0.04	0.4	0.1	10	1	675.13	0.00024
40	0.5	0.8	1	1	0.03	0.04	0.4	0.2	10	1	541.66	0.073
40	0.9	0.5	1	1	0.03	0.04	0.4	0.2	10	1	789.96	0.00075
40	0.6	0.6	1	1	0.03	0.04	0.4	0.3	10	1	400.13	0.02486
40	0.4	0.5	1	1	0.03	0.04	0.4	0.9	10	1	298.07	0.03007
40	0.9	0.2	1	1	0.03	0.04	0.4	0.9	10	1	750.14	0.00083
40	0.6	0.6	1	1	0.03	0.04	0.4	0.2	10	1	404.01	0.0256
40	0.5	0.8	1	1	0.03	0.04	0.4	0.5	10	1	547.52	0.07332
40	0.4	0.7	1	1	0.03	0.04	0.4	0.7	10	1	395.79	0.05365
40	0.7	0.8	1	1	0.03	0.04	0.4	0.6	10	1	647.7	0.04549
40	0.9	0.4	1	1	0.03	0.04	0.4	0.6	10	1	786.16	0.00081
40	0.6	0.6	1	1	0.03	0.04	0.4	0.8	10	1	396.38	0.02442
40	0.6	0.6	1	1	0.03	0.04	0.4	0.9	10	1	399.41	0.02561
40	0.6	0.5	1	1	0.03	0.04	0.4	0.9	10	1	363.09	0.01834
40	0.7	0.8	1	1	0.03	0.04	0.4	0.3	10	1	650.29	0.04687
40	0.5	0.8	1	1	0.03	0.04	0.4	0.3	10	1	546.71	0.0731
40	0.5	0.3	1	1	0.03	0.04	0.4	0.7	10	1	286.19	0.01709
40	0.3	0.3	1	1	0.03	0.04	0.4	0.3	10	1	237.44	0.02522
40	0.9	0.1	1	1	0.03	0.04	0.4	0.7	10	1	722.6	0.00075
40	0.5	0.5	1	1	0.03	0.04	0.4	0.8	10	1	323.98	0.02465
40	0.4	0.8	1	1	0.03	0.04	0.4	0	10	1	526.29	0.08237
40	0.7	0.8	1	1	0.03	0.04	0.4	0.5	10	1	646.28	0.04577
40	0.9	0.5	1	1	0.03	0.04	0.4	0.4	10	1	792.14	0.00082
40	0.5	0.1	1	1	0.03	0.04	0.4	0	10	1	268.8	0.01386
40	0.5	0.3	1	1	0.03	0.04	0.4	0.8	10	1	285.67	0.01766
40	0.5	0.2	1	1	0.03	0.04	0.4	0.1	10	1	277.3	0.01558
40	0.5	0.1	1	1	0.03	0.04	0.4	0.4	10	1	270.61	0.01421
40	0.9	0.01	1	1	0.03	0.04	0.4	0.4	10	1	696.21	0.00049
40	0.5	0.2	1	1	0.03	0.04	0.4	0.2	10	1	278.41	0.01625
40	0.5	0.1	1	1	0.03	0.04	0.4	0.3	10	1	270.47	0.01455
40	0.5	0.7	1	1	0.03	0.04	0.4	0.5	10	1	421.63	0.04658
40	0.9	0.5	1	1	0.03	0.04	0.4	0.3	10	1	799.47	0.00084
40	0.7	0.9	1	1	0.03	0.04	0.4	0.5	10	1	939.92	0.08581
40	0.9	0.6	1	1	0.03	0.04	0.4	0.8	10	1	861.31	0.00142
40	0.5	0.4	1	1	0.03	0.04	0.4	0	10	1	303.35	0.02075
40	0.5	0.1	1	1	0.03	0.04	0.4	0.2	10	1	271.68	0.01428
40	0.5	0.3	1	1	0.03	0.04	0.4	0.9	10	1	288.29	0.01804
40	0.4	0.4	1	1	0.03	0.04	0.4	0	10	1	272.48	0.02479
40	0.5	0.3	1	1	0.03	0.04	0.4	0.1	10	1	289.48	0.01783
40	0.5	0.2	1	1	0.03	0.04	0.4	0.6	10	1	277.31	0.01582
40	0.5	0.01	1	1	0.03	0.04	0.4	0	10	1	265.5	0.0136
40	0.4	0.7	1	1	0.03	0.04	0.4	0.4	10	1	387.33	0.05236
40	0.4	0.01	1	1	0.03	0.04	0.4	0.4	10	1	234.57	0.01614
40	0.3	0.2	1	1	0.03	0.04	0.4	0.3	10	1	225.19	0.02233
40	0.3	0.01	1	1	0.03	0.04	0.4	0.2	10	1	214.44	0.01908
40	0.6	0.6	1	1	0.03	0.04	0.4	0.7	10	1	404.27	0.02503
40	0.6	0.6	1	1	0.03	0.04	0.4	0.6	10	1	404.25	0.02532
40	0.6	0.9	1	1	0.03	0.04	0.4	0.2	10	1	923.97	0.10942
40	0.6	0.9	1	1	0.03	0.04	0.4	0.4	10	1	907.46	0.10541
40	0.4	0.3	1	1	0.03	0.04	0.4	0.1	10	1	252.89	0.02089
40	0.5	0.2	1	1	0.03	0.04	0.4	0.7	10	1	279.67	0.01647
40	0.3	0.01	1	1	0.03	0.04	0.4	0.4	10	1	213.49	0.01923
40	0.5	0.5	1	1	0.03	0.04	0.4	0.9	10	1	316.98	0.02401
40	0.6	0.9	1	1	0.03	0.04	0.4	0.3	10	1	917.1	0.10756
40	0.7	0.8	1	1	0.03	0.04	0.4	0.8	10	1	633.3	0.04406
40	0.7	0.8	1	1	0.03	0.04	0.4	0	10	1	651.37	0.04799
40	0.4	0.4	1	1	0.03	0.04	0.4	0.1	10	1	276.07	0.02506
40	0.5	0.5	1	1	0.03	0.04	0.4	0.5	10	1	325.84	0.02582
40	0.4	0.7	1	1	0.03	0.04	0.4	0.6	10	1	395.21	0.05356
40	0.5	0.2	1	1	0.03	0.04	0.4	0.4	10	1	276.96	0.01551
40	0.5	0.4	1	1	0.03	0.04	0.4	0.4	10	1	300.45	0.01959
40	0.5	0.1	1	1	0.03	0.04	0.4	0.1	10	1	271.85	0.01471
40	0.5	0.2	1	1	0.03	0.04	0.4	0.5	10	1	277.36	0.01583
40	0.9	0.4	1	1	0.03	0.04	0.4	0.9	10	1	794.43	0.0011
40	0.4	0.5	1	1	0.03	0.04	0.4	0.6	10	1	299.13	0.03039
40	0.6	0.01	1	1	0.03	0.04	0.4	0.7	10	1	301.75	0.00967
40	0.4	0.2	1	1	0.03	0.04	0.4	0.7	10	1	251.28	0.02002
40	0.5	0.4	1	1	0.03	0.04	0.4	0.7	10	1	303.17	0.02086
40	0.5	0.4	1	1	0.03	0.04	0.4	0.3	10	1	299.94	0.02052
40	0.3	0.3	1	1	0.03	0.04	0.4	0.7	10	1	237.5	0.02462
40	0.3	0.3	1	1	0.03	0.04	0.4	0	10	1	235.69	0.02453
40	0.4	0.4	1	1	0.03	0.04	0.4	0.7	10	1	273.23	0.02505
40	0.3	0.4	1	1	0.03	0.04	0.4	0.4	10	1	248.68	0.0282
40	0.3	0.3	1	1	0.03	0.04	0.4	0.8	10	1	232.61	0.02437
40	0.3	0.3	1	1	0.03	0.04	0.4	0.9	10	1	234.38	0.02443
40	0.3	0.3	1	1	0.03	0.04	0.4	0.5	10	1	237.49	0.02513
40	0.6	0.8	1	1	0.03	0.04	0.4	0.3	10	1	590.93	0.06264
40	0.3	0.4	1	1	0.03	0.04	0.4	0.3	10	1	252.77	0.0292
40	0.3	0.1	1	1	0.03	0.04	0.4	0.2	10	1	218.6	0.0207
40	0.3	0.2	1	1	0.03	0.04	0.4	0.4	10	1	226.98	0.0226
40	0.3	0.3	1	1	0.03	0.04	0.4	0.2	10	1	239.45	0.02501
40	0.5	0.01	1	1	0.03	0.04	0.4	0.6	10	1	263.76	0.01318
40	0.5	0.01	1	1	0.03	0.04	0.4	0.5	10	1	263.7	0.01366
40	0.4	0.6	1	1	0.03	0.04	0.4	0.3	10	1	325.42	0.03794
40	0.3	0.2	1	1	0.03	0.04	0.4	0.5	10	1	227.23	0.02285
40	0.6	0.7	1	1	0.03	0.04	0.4	0	10	1	458.24	0.03637
40	0.9	0.5	1	1	0.03	0.04	0.4	0.5	10	1	810.51	0.00095
40	0.3	0.4	1	1	0.03	0.04	0.4	0.7	10	1	250.88	0.02818
40	0.6	0.9	1	1	0.03	0.04	0.4	0.7	10	1	899.6	0.10095
40	0.9	0.7	1	1	0.03	0.04	0.4	0.8	10	1	931.46	0.00284
40	0.3	0.1	1	1	0.03	0.04	0.4	0.7	10	1	216.68	0.01966
40	0.5	0.4	1	1	0.03	0.04	0.4	0.8	10	1	300.02	0.02034
40	0.3	0.1	1	1	0.03	0.04	0.4	0.1	10	1	219.88	0.02153
40	0.9	0.5	1	1	0.03	0.04	0.4	0.1	10	1	789.78	0.00065
40	0.3	0.2	1	1	0.03	0.04	0.4	0.9	10	1	230.57	0.02287
40	0.3	0.01	1	1	0.03	0.04	0.4	0.1	10	1	216.13	0.01998
40	0.5	0.4	1	1	0.03	0.04	0.4	0.9	10	1	302.82	0.0205
40	0.3	0.5	1	1	0.03	0.04	0.4	0.5	10	1	272.54	0.03462
40	0.6	0.7	1	1	0.03	0.04	0.4	0.5	10	1	458.94	0.03659
40	0.6	0.2	1	1	0.03	0.04	0.4	0.6	10	1	314.85	0.01145
40	0.9	0.5	1	1	0.03	0.04	0.4	0.6	10	1	817.5	0.00083
40	0.6	0.7	1	1	0.03	0.04	0.4	0.1	10	1	465.34	0.03711
40	0.5	0.6	1	1	0.03	0.04	0.4	0.1	10	1	359.07	0.03291
40	0.5	0.5	1	1	0.03	0.04	0.4	0.7	10	1	322.34	0.025
40	0.5	0.5	1	1	0.03	0.04	0.4	0.6	10	1	323.71	0.02473
40	0.6	0.7	1	1	0.03	0.04	0.4	0.7	10	1	460.63	0.03708
40	0.4	0.5	1	1	0.03	0.04	0.4	0.1	10	1	295.9	0.03029
40	0.6	0.7	1	1	0.03	0.04	0.4	0.6	10	1	464.42	0.03762
40	0.5	0.5	1	1	0.03	0.04	0.4	0.3	10	1	322.76	0.02444
40	0.99	0.01	1	1	0.03	0.04	0.4	0.2	10	1	1965.6	0.00027
40	0.5	0.5	1	1	0.03	0.04	0.4	0.2	10	1	324.65	0.02567
40	0.9	0.7	1	1	0.03	0.04	0.4	0.7	10	1	933.62	0.00309
40	0.3	0.1	1	1	0.03	0.04	0.4	0	10	1	223.07	0.02105
40	0.3	0.1	1	1	0.03	0.04	0.4	0.6	10	1	219.27	0.02114
40	0.3	0.6	1	1	0.03	0.04	0.4	0.3	10	1	307.27	0.04251
40	0.9	0.5	1	1	0.03	0.04	0.4	0.8	10	1	820.15	0.00114
40	0.3	0.6	1	1	0.03	0.04	0.4	0.9	10	1	309.01	0.04333
40	0.4	0.1	1	1	0.03	0.04	0.4	0.7	10	1	239.59	0.0177
40	0.4	0.01	1	1	0.03	0.04	0.4	0.1	10	1	234.44	0.01606
40	0.9	0.8	1	1	0.03	0.04	0.4	0.5	10	1	1043.1	0.00707
40	0.4	0.4	1	1	0.03	0.04	0.4	0.8	10	1	276.03	0.02536
40	0.4	0.6	1	1	0.03	0.04	0.4	0.5	10	1	327.49	0.03841
40	0.4	0.8	1	1	0.03	0.04	0.4	0.8	10	1	517.32	0.07799
40	0.3	0.01	1	1	0.03	0.04	0.4	0.5	10	1	212.36	0.0189
40	0.4	0.01	1	1	0.03	0.04	0.4	0.7	10	1	235.45	0.01681
40	0.4	0.8	1	1	0.03	0.04	0.4	0.9	10	1	507.9	0.07648
40	0.4	0.7	1	1	0.03	0.04	0.4	0	10	1	399.12	0.05469
40	0.3	0.1	1	1	0.03	0.04	0.4	0.3	10	1	220.05	0.02119
40	0.4	0.01	1	1	0.03	0.04	0.4	0	10	1	234.68	0.01612
40	0.8	0.9	1	1	0.03	0.04	0.4	0.8	10	1	1002	0.05548
40	0.4	0.1	1	1	0.03	0.04	0.4	0.1	10	1	241.99	0.01761
40	0.4	0.3	1	1	0.03	0.04	0.4	0	10	1	258.51	0.02119
40	0.9	0.7	1	1	0.03	0.04	0.4	0	10	1	895.6	0.00169
40	0.4	0.01	1	1	0.03	0.04	0.4	0.6	10	1	235.94	0.01667
40	0.4	0.1	1	1	0.03	0.04	0.4	0.2	10	1	239.18	0.018
40	0.4	0.8	1	1	0.03	0.04	0.4	0.6	10	1	517.63	0.07962
40	0.8	0.9	1	1	0.03	0.04	0.4	0.7	10	1	1011.3	0.05649
40	0.9	0.7	1	1	0.03	0.04	0.4	0.3	10	1	910.8	0.00229
40	0.4	0.1	1	1	0.03	0.04	0.4	0.8	10	1	240.03	0.01741
40	0.2	0.4	1	1	0.03	0.04	0.4	0.1	10	1	232.79	0.03091
40	0.4	0.2	1	1	0.03	0.04	0.4	0.2	10	1	248.93	0.01982
40	0.4	0.01	1	1	0.03	0.04	0.4	0.9	10	1	234.62	0.01661
40	0.4	0.3	1	1	0.03	0.04	0.4	0.6	10	1	258.23	0.02174
40	0.3	0.4	1	1	0.03	0.04	0.4	0.1	10	1	251.6	0.02793
40	0.4	0.01	1	1	0.03	0.04	0.4	0.5	10	1	235.71	0.0168
40	0.7	0.9	1	1	0.03	0.04	0.4	0.1	10	1	982.6	0.0938
40	0.3	0.7	1	1	0.03	0.04	0.4	0.8	10	1	371.28	0.0575
40	0.4	0.2	1	1	0.03	0.04	0.4	0.4	10	1	247.93	0.01924
40	0.5	0.6	1	1	0.03	0.04	0.4	0	10	1	360.4	0.03283
40	0.6	0.5	1	1	0.03	0.04	0.4	0.2	10	1	361.63	0.01723
40	0.4	0.2	1	1	0.03	0.04	0.4	0	10	1	251.55	0.02022
40	0.4	0.3	1	1	0.03	0.04	0.4	0.2	10	1	254.23	0.0203
40	0.3	0.3	1	1	0.03	0.04	0.4	0.6	10	1	234.99	0.02513
40	0.4	0.2	1	1	0.03	0.04	0.4	0.6	10	1	248.66	0.01967
40	0.4	0.5	1	1	0.03	0.04	0.4	0.7	10	1	293.74	0.03012
40	0.9	0.5	1	1	0.03	0.04	0.4	0.9	10	1	826.82	0.00113
40	0.4	0.6	1	1	0.03	0.04	0.4	0.7	10	1	335.86	0.03925
40	0.6	0.5	1	1	0.03	0.04	0.4	0.3	10	1	369.21	0.01846
40	0.2	0.01	1	1	0.03	0.04	0.4	0.3	10	1	199.21	0.02151
40	0.4	0.3	1	1	0.03	0.04	0.4	0.5	10	1	258.74	0.02146
40	0.4	0.3	1	1	0.03	0.04	0.4	0.8	10	1	258.15	0.02173
40	0.4	0.1	1	1	0.03	0.04	0.4	0.3	10	1	242.39	0.0176
40	0.4	0.2	1	1	0.03	0.04	0.4	0.5	10	1	248.55	0.02006
40	0.2	0.01	1	1	0.03	0.04	0.4	0.7	10	1	197.81	0.02041
40	0.3	0.7	1	1	0.03	0.04	0.4	0.3	10	1	373.41	0.05948
40	0.6	0.8	1	1	0.03	0.04	0.4	0.9	10	1	584.04	0.05988
40	0.4	0.4	1	1	0.03	0.04	0.4	0.3	10	1	278.92	0.02663
40	0.2	0.3	1	1	0.03	0.04	0.4	0	10	1	220.28	0.02761
40	0.4	0.6	1	1	0.03	0.04	0.4	0.2	10	1	331.61	0.03857
40	0.4	0.7	1	1	0.03	0.04	0.4	0.8	10	1	389.94	0.05274
40	0.2	0.3	1	1	0.03	0.04	0.4	0.9	10	1	216.19	0.02696
40	0.4	0.5	1	1	0.03	0.04	0.4	0.8	10	1	295.23	0.03026
40	0.2	0.2	1	1	0.03	0.04	0.4	0.3	10	1	209.59	0.02566
40	0.6	0.9	1	1	0.03	0.04	0.4	0.9	10	1	865.11	0.09571
40	0.3	0.01	1	1	0.03	0.04	0.4	0.7	10	1	211.8	0.01859
40	0.8	0.9	1	1	0.03	0.04	0.4	0.6	10	1	1015.5	0.05871
40	0.2	0.4	1	1	0.03	0.04	0.4	0.4	10	1	233.96	0.03173
40	0.2	0.2	1	1	0.03	0.04	0.4	0	10	1	211.68	0.02553
40	0.9	0.9	1	1	0.03	0.04	0.4	0.3	10	1	1301.5	0.02625
40	0.4	0.4	1	1	0.03	0.04	0.4	0.5	10	1	272.74	0.02492
40	0.5	0.9	1	1	0.03	0.04	0.4	0.2	10	1	883.48	0.12104
40	0.2	0.3	1	1	0.03	0.04	0.4	0.2	10	1	222.04	0.02773
40	0.2	0.4	1	1	0.03	0.04	0.4	0.2	10	1	231.7	0.03074
40	0.2	0.1	1	1	0.03	0.04	0.4	0.2	10	1	205.65	0.02301
40	0.5	0.8	1	1	0.03	0.04	0.4	0	10	1	552.93	0.07493
40	0.2	0.3	1	1	0.03	0.04	0.4	0.8	10	1	222.24	0.02754
40	0.2	0.1	1	1	0.03	0.04	0.4	0.6	10	1	202.52	0.0236
40	0.2	0.5	1	1	0.03	0.04	0.4	0.2	10	1	255.84	0.03738
40	0.5	0.9	1	1	0.03	0.04	0.4	0.8	10	1	854.07	0.11035
40	0.5	0.7	1	1	0.03	0.04	0.4	0.9	10	1	416.22	0.04514
40	0.2	0.01	1	1	0.03	0.04	0.4	0.1	10	1	199.18	0.02077
40	0.2	0.01	1	1	0.03	0.04	0.4	0.5	10	1	199.86	0.02177
40	0.2	0.5	1	1	0.03	0.04	0.4	0.8	10	1	256.22	0.03669
40	0.4	0.4	1	1	0.03	0.04	0.4	0.9	10	1	276	0.02576
40	0.2	0.4	1	1	0.03	0.04	0.4	0.3	10	1	237.03	0.03206
40	0.2	0.2	1	1	0.03	0.04	0.4	0.8	10	1	211.29	0.02515
40	0.4	0.5	1	1	0.03	0.04	0.4	0.4	10	1	297.49	0.03046
40	0.2	0.6	1	1	0.03	0.04	0.4	0.2	10	1	290.21	0.0468
40	0.9	0.8	1	1	0.03	0.04	0.4	0.1	10	1	1019.7	0.00563
40	0.2	0.5	1	1	0.03	0.04	0.4	0.7	10	1	258.11	0.03758
40	0.3	0.6	1	1	0.03	0.04	0.4	0.6	10	1	308.66	0.04248
40	0.3	0.7	1	1	0.03	0.04	0.4	0.2	10	1	367.81	0.05819
40	0.3	0.2	1	1	0.03	0.04	0.4	0.6	10	1	227.13	0.02288
40	0.8	0.9	1	1	0.03	0.04	0.4	0.5	10	1	1025.4	0.05963
40	0.3	0.8	1	1	0.03	0.04	0.4	0.1	10	1	498.17	0.08644
40	0.3	0.2	1	1	0.03	0.04	0.4	0.1	10	1	226.65	0.02226
40	0.3	0.2	1	1	0.03	0.04	0.4	0.2	10	1	226.64	0.02246
40	0.4	0.6	1	1	0.03	0.04	0.4	0.4	10	1	329.05	0.03872
40	0.2	0.6	1	1	0.03	0.04	0.4	0.9	10	1	285.67	0.04497
40	0.3	0.01	1	1	0.03	0.04	0.4	0.3	10	1	219.16	0.02008
40	0.3	0.1	1	1	0.03	0.04	0.4	0.4	10	1	219.47	0.02066
40	0.3	0.2	1	1	0.03	0.04	0.4	0.8	10	1	226.02	0.02201
40	0.5	0.7	1	1	0.03	0.04	0.4	0.7	10	1	419.58	0.04623
40	0.3	0.1	1	1	0.03	0.04	0.4	0.5	10	1	220.7	0.0209
40	0.5	0.8	1	1	0.03	0.04	0.4	0.7	10	1	537.7	0.0716
40	0.3	0.2	1	1	0.03	0.04	0.4	0	10	1	227.41	0.02171
40	0.5	0.7	1	1	0.03	0.04	0.4	0.8	10	1	420.95	0.04698
40	0.4	0.6	1	1	0.03	0.04	0.4	0.6	10	1	326.93	0.03757
40	0.3	0.8	1	1	0.03	0.04	0.4	0.4	10	1	499.83	0.0859
40	0.3	0.01	1	1	0.03	0.04	0.4	0	10	1	212.08	0.01876
40	0.3	0.2	1	1	0.03	0.04	0.4	0.7	10	1	228.36	0.02195
40	0.3	0.8	1	1	0.03	0.04	0.4	0.9	10	1	490.36	0.08168
40	0.5	0.9	1	1	0.03	0.04	0.4	0.4	10	1	871.16	0.11743
40	0.9	0.9	1	1	0.03	0.04	0.4	0.5	10	1	1271.3	0.02485
40	0.3	0.4	1	1	0.03	0.04	0.4	0	10	1	249.47	0.02868
40	0.2	0.7	1	1	0.03	0.04	0.4	0.2	10	1	346.38	0.0617
40	0.3	0.01	1	1	0.03	0.04	0.4	0.8	10	1	212.03	0.01897
40	0.3	0.01	1	1	0.03	0.04	0.4	0.9	10	1	213.65	0.01921
40	0.3	0.3	1	1	0.03	0.04	0.4	0.1	10	1	235.43	0.02542
40	0.2	0.5	1	1	0.03	0.04	0.4	0	10	1	255.36	0.03681
40	0.3	0.1	1	1	0.03	0.04	0.4	0.9	10	1	217.26	0.02022
40	0.2	0.3	1	1	0.03	0.04	0.4	0.6	10	1	216.89	0.02644
40	0.9	0.9	1	1	0.03	0.04	0.4	0	10	1	1288.9	0.02411
40	0.3	0.01	1	1	0.03	0.04	0.4	0.6	10	1	215.71	0.01932
40	0.3	0.4	1	1	0.03	0.04	0.4	0.9	10	1	250.78	0.02804
40	0.1	0.6	1	1	0.03	0.04	0.4	0.5	10	1	274.2	0.04856
40	0.3	0.3	1	1	0.03	0.04	0.4	0.4	10	1	238.94	0.0262
40	0.8	0.9	1	1	0.03	0.04	0.4	0.2	10	1	1055.1	0.06428
40	0.3	0.4	1	1	0.03	0.04	0.4	0.8	10	1	250.88	0.02891
40	0.3	0.8	1	1	0.03	0.04	0.4	0.8	10	1	496.03	0.0838
40	0.3	0.1	1	1	0.03	0.04	0.4	0.8	10	1	221.03	0.02093
40	0.4	0.6	1	1	0.03	0.04	0.4	0.8	10	1	329.08	0.03839
40	0.4	0.6	1	1	0.03	0.04	0.4	0.9	10	1	328.55	0.0372
40	0.1	0.5	1	1	0.03	0.04	0.4	0	10	1	242.33	0.0389
40	0.3	0.5	1	1	0.03	0.04	0.4	0.3	10	1	274.48	0.03376
40	0.3	0.4	1	1	0.03	0.04	0.4	0.5	10	1	248.38	0.02829
40	0.2	0.7	1	1	0.03	0.04	0.4	0.1	10	1	349.8	0.06042
40	0.2	0.8	1	1	0.03	0.04	0.4	0	10	1	482.4	0.09277
40	0.3	0.5	1	1	0.03	0.04	0.4	0.2	10	1	274.7	0.03396
40	0.2	0.7	1	1	0.03	0.04	0.4	0	10	1	358.88	0.0632
40	0.1	0.2	1	1	0.03	0.04	0.4	0	10	1	198.75	0.02751
40	0.2	0.8	1	1	0.03	0.04	0.4	0.2	10	1	476.82	0.09021
40	0.3	0.4	1	1	0.03	0.04	0.4	0.6	10	1	250.97	0.02817
40	0.1	0.3	1	1	0.03	0.04	0.4	0.3	10	1	208.53	0.02976
40	0.1	0.3	1	1	0.03	0.04	0.4	0.2	10	1	208.54	0.02998
40	0.2	0.7	1	1	0.03	0.04	0.4	0.6	10	1	353.36	0.06179
40	0.2	0.1	1	1	0.03	0.04	0.4	0.1	10	1	205.36	0.02401
40	0.2	0.2	1	1	0.03	0.04	0.4	0.7	10	1	210.26	0.02459
40	0.1	0.3	1	1	0.03	0.04	0.4	0.1	10	1	208.92	0.03076
40	0.1	0.3	1	1	0.03	0.04	0.4	0	10	1	206.9	0.0295
40	0.3	0.5	1	1	0.03	0.04	0.4	0.8	10	1	269.7	0.0326
40	0.1	0.1	1	1	0.03	0.04	0.4	0.9	10	1	192.95	0.02513
40	0.1	0.3	1	1	0.03	0.04	0.4	0.9	10	1	206.46	0.02886
40	0.3	0.5	1	1	0.03	0.04	0.4	0.9	10	1	272.59	0.03316
40	0.2	0.8	1	1	0.03	0.04	0.4	0.8	10	1	472.48	0.08609
40	0.1	0.4	1	1	0.03	0.04	0.4	0.5	10	1	221.54	0.03326
40	0.1	0.4	1	1	0.03	0.04	0.4	0	10	1	220.02	0.03332
40	0.1	0.7	1	1	0.03	0.04	0.4	0.1	10	1	339.48	0.06447
40	0.1	0.4	1	1	0.03	0.04	0.4	0.8	10	1	221.13	0.03357
40	0.2	0.4	1	1	0.03	0.04	0.4	0.8	10	1	233.27	0.03179
40	0.3	0.5	1	1	0.03	0.04	0.4	0.7	10	1	275.32	0.03475
40	0.1	0.4	1	1	0.03	0.04	0.4	0.2	10	1	222.4	0.03417
40	0.2	0.7	1	1	0.03	0.04	0.4	0.5	10	1	355.61	0.06258
40	0.1	0.5	1	1	0.03	0.04	0.4	0.8	10	1	243.47	0.0396
40	0.1	0.4	1	1	0.03	0.04	0.4	0.3	10	1	221.86	0.03387
40	0.1	0.5	1	1	0.03	0.04	0.4	0.4	10	1	241.07	0.03948
40	0.1	0.5	1	1	0.03	0.04	0.4	0.2	10	1	243.81	0.04026
40	0.1	0.5	1	1	0.03	0.04	0.4	0.7	10	1	243.69	0.03995
40	0.3	0.6	1	1	0.03	0.04	0.4	0.7	10	1	307.21	0.04263
40	0.3	0.4	1	1	0.03	0.04	0.4	0.2	10	1	253.57	0.02826
40	0.1	0.5	1	1	0.03	0.04	0.4	0.9	10	1	241.76	0.03909
40	0.1	0.01	1	1	0.03	0.04	0.4	0.8	10	1	194.53	0.02396
40	0.1	0.01	1	1	0.03	0.04	0.4	0.6	10	1	194.66	0.02386
40	0.1	0.5	1	1	0.03	0.04	0.4	0.1	10	1	243.29	0.04022
40	0.1	0.01	1	1	0.03	0.04	0.4	0.3	10	1	193.57	0.02292
40	0.2	0.2	1	1	0.03	0.04	0.4	0.1	10	1	210.91	0.0255
40	0.3	0.5	1	1	0.03	0.04	0.4	0.4	10	1	272.36	0.03344
40	0.3	0.5	1	1	0.03	0.04	0.4	0.6	10	1	271.67	0.03346
40	0.1	0.5	1	1	0.03	0.04	0.4	0.5	10	1	242.36	0.03985
40	0.2	0.5	1	1	0.03	0.04	0.4	0.9	10	1	255.8	0.03672
40	0.1	0.01	1	1	0.03	0.04	0.4	0	10	1	195.81	0.02383
40	0.2	0.8	1	1	0.03	0.04	0.4	0.3	10	1	481.74	0.08992
40	0.3	0.6	1	1	0.03	0.04	0.4	0.8	10	1	305.7	0.0415
40	0.1	0.5	1	1	0.03	0.04	0.4	0.6	10	1	243.46	0.03978
40	0.9	0.6	1	1	0.03	0.04	0.4	0.9	10	1	862.04	0.00193
40	0.1	0.6	1	1	0.03	0.04	0.4	0.2	10	1	276.98	0.04936
40	0.3	0.6	1	1	0.03	0.04	0.4	0	10	1	310.08	0.04302
40	0.1	0.1	1	1	0.03	0.04	0.4	0.7	10	1	193.27	0.02514
40	0.3	0.7	1	1	0.03	0.04	0.4	0.5	10	1	370.5	0.05742
40	0.2	0.3	1	1	0.03	0.04	0.4	0.1	10	1	218.95	0.02748
40	0.2	0.3	1	1	0.03	0.04	0.4	0.4	10	1	218.38	0.02793
40	0.1	0.01	1	1	0.03	0.04	0.4	0.5	10	1	193.36	0.02355
40	0.1	0.1	1	1	0.03	0.04	0.4	0.8	10	1	190.81	0.02492
40	0.4	0.4	1	1	0.03	0.04	0.4	0.6	10	1	275.54	0.02498
40	0.3	0.6	1	1	0.03	0.04	0.4	0.4	10	1	304.4	0.04206
40	0.2	0.6	1	1	0.03	0.04	0.4	0.4	10	1	293.91	0.04623
40	0.7	0.9	1	1	0.03	0.04	0.4	0	10	1	975.43	0.09484
40	0.5	0.8	1	1	0.03	0.04	0.4	0.1	10	1	556.39	0.07496
40	0.4	0.8	1	1	0.03	0.04	0.4	0.5	10	1	518.36	0.07945
40	0.1	0.6	1	1	0.03	0.04	0.4	0.9	10	1	280.13	0.04966
40	0.3	0.7	1	1	0.03	0.04	0.4	0.4	10	1	369.15	0.0566
40	0.3	0.6	1	1	0.03	0.04	0.4	0.1	10	1	307.89	0.04223
40	0.4	0.7	1	1	0.03	0.04	0.4	0.3	10	1	391.6	0.05336
40	0.1	0.01	1	1	0.03	0.04	0.4	0.4	10	1	192.56	0.02323
40	0.2	0.3	1	1	0.03	0.04	0.4	0.3	10	1	219.46	0.02753
40	0.2	0.1	1	1	0.03	0.04	0.4	0	10	1	202.4	0.02281
40	0.1	0.4	1	1	0.03	0.04	0.4	0.9	10	1	218.11	0.03323
40	0.2	0.01	1	1	0.03	0.04	0.4	0	10	1	201.48	0.02189
40	0.1	0.5	1	1	0.03	0.04	0.4	0.3	10	1	239.91	0.03837
40	0.4	0.7	1	1	0.03	0.04	0.4	0.9	10	1	388.8	0.05225
40	0.2	0.1	1	1	0.03	0.04	0.4	0.5	10	1	204.94	0.0226
40	0.1	0.6	1	1	0.03	0.04	0.4	0.6	10	1	280.39	0.04918
40	0.2	0.2	1	1	0.03	0.04	0.4	0.9	10	1	209.58	0.02443
40	0.2	0.3	1	1	0.03	0.04	0.4	0.7	10	1	215.18	0.02731
40	0.2	0.2	1	1	0.03	0.04	0.4	0.2	10	1	211.29	0.02539
40	0.01	0.3	1	1	0.03	0.04	0.4	0.3	10	1	197.81	0.03093
40	0.2	0.1	1	1	0.03	0.04	0.4	0.3	10	1	201.36	0.023
40	0.2	0.2	1	1	0.03	0.04	0.4	0.5	10	1	210.66	0.02497
40	0.2	0.1	1	1	0.03	0.04	0.4	0.4	10	1	204.34	0.02319
40	0.2	0.01	1	1	0.03	0.04	0.4	0.2	10	1	202.3	0.02156
40	0.2	0.1	1	1	0.03	0.04	0.4	0.7	10	1	205.09	0.02327
40	0.2	0.4	1	1	0.03	0.04	0.4	0.7	10	1	236.4	0.03199
40	0.5	0.8	1	1	0.03	0.04	0.4	0.9	10	1	540.12	0.07033
40	0.1	0.7	1	1	0.03	0.04	0.4	0.6	10	1	333.37	0.06345
40	0.3	0.6	1	1	0.03	0.04	0.4	0.2	10	1	308.86	0.0427
40	0.3	0.6	1	1	0.03	0.04	0.4	0.5	10	1	306.22	0.04167
40	0.2	0.5	1	1	0.03	0.04	0.4	0.3	10	1	254.28	0.03668
40	0.2	0.01	1	1	0.03	0.04	0.4	0.9	10	1	200.87	0.02179
40	0.5	0.8	1	1	0.03	0.04	0.4	0.8	10	1	541.97	0.07076
40	0.2	0.4	1	1	0.03	0.04	0.4	0.9	10	1	232.7	0.03102
40	0.7	0.9	1	1	0.03	0.04	0.4	0.3	10	1	962.08	0.09037
40	0.2	0.1	1	1	0.03	0.04	0.4	0.9	10	1	202.89	0.02302
40	0.2	0.1	1	1	0.03	0.04	0.4	0.8	10	1	203.38	0.02269
40	0.1	0.1	1	1	0.03	0.04	0.4	0.2	10	1	193.26	0.02492
40	0.01	0.6	1	1	0.03	0.04	0.4	0.4	10	1	267.25	0.05166
40	0.5	0.9	1	1	0.03	0.04	0.4	0.6	10	1	850.74	0.11236
40	0.01	0.6	1	1	0.03	0.04	0.4	0.3	10	1	271.11	0.05191
40	0.2	0.5	1	1	0.03	0.04	0.4	0.1	10	1	255.83	0.03688
40	0.1	0.7	1	1	0.03	0.04	0.4	0.8	10	1	338.02	0.06496
40	0.2	0.4	1	1	0.03	0.04	0.4	0.5	10	1	233.72	0.0314
40	0.2	0.01	1	1	0.03	0.04	0.4	0.4	10	1	203.15	0.02155
40	0.2	0.4	1	1	0.03	0.04	0.4	0	10	1	237.12	0.0318
40	0.2	0.2	1	1	0.03	0.04	0.4	0.4	10	1	212.36	0.02514
40	0.2	0.01	1	1	0.03	0.04	0.4	0.6	10	1	199.95	0.02255
40	0.1	0.7	1	1	0.03	0.04	0.4	0.2	10	1	336.82	0.06515
40	0.9	0.9	1	1	0.03	0.04	0.4	0.6	10	1	1282.9	0.02471
40	0.2	0.4	1	1	0.03	0.04	0.4	0.6	10	1	235.05	0.03176
40	0.2	0.01	1	1	0.03	0.04	0.4	0.8	10	1	200.34	0.02142
40	0.1	0.7	1	1	0.03	0.04	0.4	0.9	10	1	343.98	0.06548
40	0.2	0.8	1	1	0.03	0.04	0.4	0.7	10	1	477.7	0.08909
40	0.9	0.9	1	1	0.03	0.04	0.4	0.7	10	1	1282.7	0.02471
40	0.2	0.2	1	1	0.03	0.04	0.4	0.6	10	1	210.15	0.02564
40	0.2	0.3	1	1	0.03	0.04	0.4	0.5	10	1	220.32	0.02663
40	0.2	0.7	1	1	0.03	0.04	0.4	0.8	10	1	353.06	0.06186
40	0.6	0.9	1	1	0.03	0.04	0.4	0.5	10	1	892.36	0.10335
40	0.1	0.4	1	1	0.03	0.04	0.4	0.6	10	1	219.11	0.03301
40	0.4	0.9	1	1	0.03	0.04	0.4	0.3	10	1	839.74	0.12666
40	0.2	0.8	1	1	0.03	0.04	0.4	0.6	10	1	484.76	0.09069
40	0.1	0.8	1	1	0.03	0.04	0.4	0.2	10	1	464.91	0.09431
40	0.1	0.4	1	1	0.03	0.04	0.4	0.4	10	1	217.87	0.03289
40	0.01	0.3	1	1	0.03	0.04	0.4	0.1	10	1	198.08	0.03081
40	0.01	0.3	1	1	0.03	0.04	0.4	0.2	10	1	195.37	0.03011
40	0.01	0.2	1	1	0.03	0.04	0.4	0.1	10	1	188.91	0.0285
40	0.4	0.9	1	1	0.03	0.04	0.4	0.2	10	1	841.3	0.12598
40	0.5	0.8	1	1	0.03	0.04	0.4	0.6	10	1	536.86	0.07077
40	0.01	0.3	1	1	0.03	0.04	0.4	0.8	10	1	195.76	0.03177
40	0.01	0.4	1	1	0.03	0.04	0.4	0.8	10	1	213.38	0.03621
40	0.4	0.8	1	1	0.03	0.04	0.4	0.7	10	1	519.61	0.07944
40	0.1	0.6	1	1	0.03	0.04	0.4	0.8	10	1	281.24	0.04949
40	0.1	0.7	1	1	0.03	0.04	0.4	0.4	10	1	335.84	0.06409
40	0.01	0.2	1	1	0.03	0.04	0.4	0.8	10	1	190.07	0.02871
40	0.01	0.2	1	1	0.03	0.04	0.4	0.5	10	1	189.94	0.02881
40	0.01	0.5	1	1	0.03	0.04	0.4	0.3	10	1	233.89	0.0425
40	0.01	0.7	1	1	0.03	0.04	0.4	0	10	1	334.81	0.06942
40	0.5	0.9	1	1	0.03	0.04	0.4	0.5	10	1	860.99	0.11473
40	0.2	0.5	1	1	0.03	0.04	0.4	0.4	10	1	255.29	0.03684
40	0.2	0.7	1	1	0.03	0.04	0.4	0.9	10	1	351.59	0.06197
40	0.01	0.7	1	1	0.03	0.04	0.4	0.9	10	1	322.03	0.06496
40	0.01	0.3	1	1	0.03	0.04	0.4	0.7	10	1	199.85	0.03131
40	0.2	0.5	1	1	0.03	0.04	0.4	0.5	10	1	255.36	0.03667
40	0.2	0.5	1	1	0.03	0.04	0.4	0.6	10	1	254.54	0.03667
40	0.6	0.9	1	1	0.03	0.04	0.4	0.6	10	1	897.53	0.10259
40	0.1	0.4	1	1	0.03	0.04	0.4	0.1	10	1	222.12	0.03405
40	0.1	0.2	1	1	0.03	0.04	0.4	0.4	10	1	198.35	0.02677
40	0.01	0.1	1	1	0.03	0.04	0.4	0.3	10	1	188.59	0.02645
40	0.1	0.01	1	1	0.03	0.04	0.4	0.9	10	1	191.79	0.02324
40	0.01	0.5	1	1	0.03	0.04	0.4	0.9	10	1	229.98	0.04145
40	0.01	0.2	1	1	0.03	0.04	0.4	0.9	10	1	189.06	0.02875
40	0.3	0.5	1	1	0.03	0.04	0.4	0.1	10	1	273.45	0.03368
40	0.1	0.8	1	1	0.03	0.04	0.4	0.1	10	1	463.09	0.09489
40	0.3	0.5	1	1	0.03	0.04	0.4	0	10	1	275.35	0.03464
40	0.9	0.9	1	1	0.03	0.04	0.4	0.2	10	1	1282.6	0.02572
40	0.9	0.9	1	1	0.03	0.04	0.4	0.1	10	1	1288.9	0.02577
40	0.2	0.6	1	1	0.03	0.04	0.4	0	10	1	291.23	0.04666
40	0.01	0.1	1	1	0.03	0.04	0.4	0.6	10	1	187.89	0.02631
40	0.1	0.2	1	1	0.03	0.04	0.4	0.5	10	1	198.67	0.0279
40	0.1	0.2	1	1	0.03	0.04	0.4	0.1	10	1	198.45	0.02665
40	0.3	0.7	1	1	0.03	0.04	0.4	0.1	10	1	369.59	0.05878
40	0.1	0.1	1	1	0.03	0.04	0.4	0.4	10	1	193.53	0.02505
40	0.3	0.7	1	1	0.03	0.04	0.4	0.7	10	1	369.38	0.05806
40	0.1	0.1	1	1	0.03	0.04	0.4	0.5	10	1	193.34	0.02443
40	0.3	0.7	1	1	0.03	0.04	0.4	0.9	10	1	369.08	0.05842
40	0.1	0.2	1	1	0.03	0.04	0.4	0.8	10	1	199.48	0.02745
40	0.01	0.6	1	1	0.03	0.04	0.4	0	10	1	266.32	0.05136
40	0.01	0.1	1	1	0.03	0.04	0.4	0.5	10	1	190.87	0.02687
40	0.4	0.7	1	1	0.03	0.04	0.4	0.5	10	1	394.56	0.05364
40	0.1	0.2	1	1	0.03	0.04	0.4	0.2	10	1	201.22	0.02795
40	0.3	0.7	1	1	0.03	0.04	0.4	0.6	10	1	370.43	0.05805
40	0.1	0.2	1	1	0.03	0.04	0.4	0.9	10	1	200.53	0.02825
40	0.01	0.1	1	1	0.03	0.04	0.4	0.9	10	1	190	0.02626
40	0.3	0.7	1	1	0.03	0.04	0.4	0	10	1	373.11	0.05903
40	0.1	0.2	1	1	0.03	0.04	0.4	0.6	10	1	197.32	0.02789
40	0.2	0.9	1	1	0.03	0.04	0.4	0.7	10	1	778.57	0.1246
40	0.01	0.01	1	1	0.03	0.04	0.4	0.5	10	1	262.98	0.02514
40	0.1	0.3	1	1	0.03	0.04	0.4	0.7	10	1	205.55	0.02982
40	0.1	0.3	1	1	0.03	0.04	0.4	0.4	10	1	209.27	0.03041
40	0.1	0.1	1	1	0.03	0.04	0.4	0.3	10	1	193.23	0.02511
40	0.1	0.2	1	1	0.03	0.04	0.4	0.7	10	1	196.22	0.02689
40	0.2	0.6	1	1	0.03	0.04	0.4	0.1	10	1	290.09	0.04583
40	0.1	0.01	1	1	0.03	0.04	0.4	0.2	10	1	197.33	0.02382
40	0.1	0.01	1	1	0.03	0.04	0.4	0.1	10	1	193.74	0.02352
40	0.1	0.3	1	1	0.03	0.04	0.4	0.8	10	1	208.35	0.03041
40	0.1	0.1	1	1	0.03	0.04	0.4	0.6	10	1	194.69	0.02612
40	0.2	0.6	1	1	0.03	0.04	0.4	0.5	10	1	292.53	0.04693
40	0.1	0.3	1	1	0.03	0.04	0.4	0.5	10	1	205.75	0.029
40	0.1	0.01	1	1	0.03	0.04	0.4	0.7	10	1	193.6	0.02442
40	0.1	0.3	1	1	0.03	0.04	0.4	0.6	10	1	206.07	0.03048
40	0.2	0.6	1	1	0.03	0.04	0.4	0.3	10	1	293.96	0.04726
40	0.2	0.6	1	1	0.03	0.04	0.4	0.7	10	1	288.7	0.04572
40	0.3	0.9	1	1	0.03	0.04	0.4	0.4	10	1	817.45	0.12998
40	0.2	0.6	1	1	0.03	0.04	0.4	0.8	10	1	291.88	0.04539
40	0.2	0.7	1	1	0.03	0.04	0.4	0.7	10	1	354.78	0.06119
40	0.3	0.9	1	1	0.03	0.04	0.4	0.1	10	1	830.79	0.13572
40	0.01	0.7	1	1	0.03	0.04	0.4	0.2	10	1	328.65	0.06771
40	0.1	0.4	1	1	0.03	0.04	0.4	0.7	10	1	223.58	0.0351
40	0.01	0.7	1	1	0.03	0.04	0.4	0.1	10	1	332.26	0.06849
40	0.01	0.8	1	1	0.03	0.04	0.4	0	10	1	462.48	0.09972
40	0.01	0.2	1	1	0.03	0.04	0.4	0.6	10	1	189.29	0.02923
40	0.01	0.7	1	1	0.03	0.04	0.4	0.8	10	1	331.43	0.06804
40	0.3	0.9	1	1	0.03	0.04	0.4	0.2	10	1	830.14	0.13493
40	0.99	0.01	1	1	0.03	0.04	0.4	0.1	10	1	1941.6	0.00021
40	0.2	0.6	1	1	0.03	0.04	0.4	0.6	10	1	289.31	0.04532
40	0.01	0.01	1	1	0.03	0.04	0.4	0.6	10	1	262.45	0.02515
40	0.01	0.01	1	1	0.03	0.04	0.4	0.9	10	1	262.54	0.02521
40	0.01	0.5	1	1	0.03	0.04	0.4	0.4	10	1	234.68	0.04233
40	0.01	0.3	1	1	0.03	0.04	0.4	0.6	10	1	196.22	0.03105
40	0.1	0.2	1	1	0.03	0.04	0.4	0.3	10	1	196.47	0.02647
40	0.01	0.5	1	1	0.03	0.04	0.4	0.6	10	1	232.44	0.04196
40	0.01	0.2	1	1	0.03	0.04	0.4	0.7	10	1	187.53	0.02845
40	0.1	0.6	1	1	0.03	0.04	0.4	0.7	10	1	271.11	0.04763
40	0.01	0.3	1	1	0.03	0.04	0.4	0.4	10	1	196.48	0.0315
40	0.9	0.99	1	1	0.03	0.04	0.4	0.8	10	1	3274.1	0.05632
40	0.01	0.5	1	1	0.03	0.04	0.4	0.8	10	1	233.61	0.04164
40	0.1	0.1	1	1	0.03	0.04	0.4	0	10	1	191.81	0.02437
40	0.01	0.3	1	1	0.03	0.04	0.4	0.5	10	1	196.02	0.03184
40	0.1	0.6	1	1	0.03	0.04	0.4	0	10	1	278.06	0.04961
40	0.1	0.1	1	1	0.03	0.04	0.4	0.1	10	1	194.26	0.02494
40	0.01	0.2	1	1	0.03	0.04	0.4	0.3	10	1	191.06	0.0294
40	0.01	0.2	1	1	0.03	0.04	0.4	0.4	10	1	188.93	0.02897
40	0.1	0.6	1	1	0.03	0.04	0.4	0.1	10	1	279.5	0.04967
40	0.2	0.8	1	1	0.03	0.04	0.4	0.9	10	1	472.54	0.08655
40	0.1	0.6	1	1	0.03	0.04	0.4	0.4	10	1	274.08	0.049
40	0.1	0.6	1	1	0.03	0.04	0.4	0.3	10	1	275.62	0.04806
40	0.2	0.7	1	1	0.03	0.04	0.4	0.4	10	1	354.56	0.06234
40	0.01	0.2	1	1	0.03	0.04	0.4	0.2	10	1	188.61	0.02883
40	0.2	0.7	1	1	0.03	0.04	0.4	0.3	10	1	356.45	0.06278
40	0.01	0.3	1	1	0.03	0.04	0.4	0.9	10	1	197.99	0.03229
40	0.01	0.2	1	1	0.03	0.04	0.4	0	10	1	189.3	0.02798
40	0.01	0.3	1	1	0.03	0.04	0.4	0	10	1	199.09	0.03157
40	0.01	0.5	1	1	0.03	0.04	0.4	0.5	10	1	232.46	0.04089
40	0.01	0.1	1	1	0.03	0.04	0.4	0	10	1	190.65	0.02697
40	0.01	0.4	1	1	0.03	0.04	0.4	0.9	10	1	212.88	0.03609
40	0.01	0.8	1	1	0.03	0.04	0.4	0.8	10	1	442.39	0.09135
40	0.3	0.8	1	1	0.03	0.04	0.4	0.6	10	1	499.85	0.0857
40	0.01	0.1	1	1	0.03	0.04	0.4	0.4	10	1	189.36	0.02625
40	0.01	0.1	1	1	0.03	0.04	0.4	0.1	10	1	191.16	0.02739
40	0.01	0.1	1	1	0.03	0.04	0.4	0.2	10	1	192.39	0.02646
40	0.01	0.8	1	1	0.03	0.04	0.4	0.9	10	1	446.07	0.08997
40	0.01	0.4	1	1	0.03	0.04	0.4	0.3	10	1	213.21	0.03542
40	0.99	0.01	1	1	0.03	0.04	0.4	0.5	10	1	2111.5	0.00077
40	0.01	0.4	1	1	0.03	0.04	0.4	0.5	10	1	208.07	0.03372
40	0.01	0.4	1	1	0.03	0.04	0.4	0	10	1	209.63	0.03567
40	0.01	0.01	1	1	0.03	0.04	0.4	0.8	10	1	264.16	0.02574
40	0.01	0.4	1	1	0.03	0.04	0.4	0.4	10	1	207.97	0.0345
40	0.4	0.8	1	1	0.03	0.04	0.4	0.2	10	1	518.08	0.08076
40	0.01	0.4	1	1	0.03	0.04	0.4	0.1	10	1	211.02	0.03547
40	0.99	0.01	1	1	0.03	0.04	0.4	0.6	10	1	2172.3	0.00104
40	0.01	0.6	1	1	0.03	0.04	0.4	0.1	10	1	271.67	0.0521
40	0.01	0.4	1	1	0.03	0.04	0.4	0.2	10	1	210.48	0.0348
40	0.01	0.7	1	1	0.03	0.04	0.4	0.3	10	1	328.63	0.06774
40	0.01	0.1	1	1	0.03	0.04	0.4	0.7	10	1	189.04	0.02683
40	0.01	0.1	1	1	0.03	0.04	0.4	0.8	10	1	189.12	0.02601
40	0.01	0.5	1	1	0.03	0.04	0.4	0.1	10	1	231.67	0.04193
40	0.01	0.4	1	1	0.03	0.04	0.4	0.7	10	1	212.16	0.0357
40	0.01	0.4	1	1	0.03	0.04	0.4	0.6	10	1	213.16	0.03678
40	0.01	0.5	1	1	0.03	0.04	0.4	0	10	1	233.04	0.04194
40	0.4	0.9	1	1	0.03	0.04	0.4	0.8	10	1	826.77	0.11706
40	0.3	0.8	1	1	0.03	0.04	0.4	0.7	10	1	493.64	0.08416
40	0.01	0.5	1	1	0.03	0.04	0.4	0.7	10	1	228.34	0.04073
40	0.01	0.5	1	1	0.03	0.04	0.4	0.2	10	1	232.42	0.04185
40	0.3	0.9	1	1	0.03	0.04	0.4	0.6	10	1	814.13	0.1263
40	0.3	0.8	1	1	0.03	0.04	0.4	0	10	1	508.72	0.08855
40	0.01	0.6	1	1	0.03	0.04	0.4	0.2	10	1	264.56	0.04994
40	0.5	0.9	1	1	0.03	0.04	0.4	0.9	10	1	842.28	0.10715
40	0.2	0.9	1	1	0.03	0.04	0.4	0.1	10	1	813.38	0.14006
40	0.1	0.8	1	1	0.03	0.04	0.4	0.3	10	1	463.98	0.09263
40	0.01	0.6	1	1	0.03	0.04	0.4	0.9	10	1	266.25	0.05139
40	0.3	0.8	1	1	0.03	0.04	0.4	0.5	10	1	496.98	0.08596
40	0.1	0.7	1	1	0.03	0.04	0.4	0.7	10	1	337.95	0.06465
40	0.2	0.9	1	1	0.03	0.04	0.4	0.5	10	1	784.01	0.13001
40	0.99	0.01	1	1	0.03	0.04	0.4	0.4	10	1	2074.3	0.0005
40	0.4	0.8	1	1	0.03	0.04	0.4	0.1	10	1	522.82	0.08241
40	0.01	0.6	1	1	0.03	0.04	0.4	0.5	10	1	263.38	0.05068
40	0.1	0.7	1	1	0.03	0.04	0.4	0.5	10	1	339.76	0.06517
40	0.1	0.7	1	1	0.03	0.04	0.4	0.3	10	1	344.89	0.06701
40	0.01	0.8	1	1	0.03	0.04	0.4	0.6	10	1	455.09	0.09561
40	0.01	0.6	1	1	0.03	0.04	0.4	0.8	10	1	262.75	0.05046
40	0.2	0.9	1	1	0.03	0.04	0.4	0.2	10	1	797.7	0.13681
40	0.01	0.6	1	1	0.03	0.04	0.4	0.6	10	1	263.48	0.04982
40	0.01	0.6	1	1	0.03	0.04	0.4	0.7	10	1	266.17	0.0504
40	0.01	0.01	1	1	0.03	0.04	0.4	0.4	10	1	259.66	0.02488
40	0.01	0.7	1	1	0.03	0.04	0.4	0.5	10	1	330.67	0.06744
40	0.1	0.7	1	1	0.03	0.04	0.4	0	10	1	344.42	0.0667
40	0.4	0.8	1	1	0.03	0.04	0.4	0.4	10	1	519.45	0.07925
40	0.3	0.8	1	1	0.03	0.04	0.4	0.3	10	1	502.07	0.08647
40	0.4	0.8	1	1	0.03	0.04	0.4	0.3	10	1	527.52	0.08278
40	0.3	0.8	1	1	0.03	0.04	0.4	0.2	10	1	504.52	0.08821
40	0.99	0.1	1	1	0.03	0.04	0.4	0.6	10	1	2270	0.00101
40	0.99	0.1	1	1	0.03	0.04	0.4	0.2	10	1	2096.6	0.00035
40	0.01	0.01	1	1	0.03	0.04	0.4	0.3	10	1	261.3	0.02486
40	0.01	0.01	1	1	0.03	0.04	0.4	0.1	10	1	265.64	0.02483
40	0.2	0.9	1	1	0.03	0.04	0.4	0.4	10	1	801.59	0.13329
40	0.01	0.01	1	1	0.03	0.04	0.4	0	10	1	263.1	0.02522
40	0.01	0.01	1	1	0.03	0.04	0.4	0.2	10	1	266.27	0.02608
40	0.01	0.01	1	1	0.03	0.04	0.4	0.7	10	1	263.41	0.02482
40	0.9	0.99	1	1	0.03	0.04	0.4	0.5	10	1	3535.4	0.06446
40	0.01	0.7	1	1	0.03	0.04	0.4	0.4	10	1	326.01	0.06729
40	0.01	0.7	1	1	0.03	0.04	0.4	0.6	10	1	331.43	0.06826
40	0.2	0.8	1	1	0.03	0.04	0.4	0.1	10	1	479.47	0.09066
40	0.9	0.99	1	1	0.03	0.04	0.4	0.4	10	1	3617	0.06627
40	0.1	0.9	1	1	0.03	0.04	0.4	0.6	10	1	764.62	0.13091
40	0.1	0.9	1	1	0.03	0.04	0.4	0.7	10	1	763.52	0.12867
40	0.2	0.8	1	1	0.03	0.04	0.4	0.5	10	1	474.09	0.08845
40	0.2	0.8	1	1	0.03	0.04	0.4	0.4	10	1	479.55	0.08926
40	0.1	0.9	1	1	0.03	0.04	0.4	0.8	10	1	763.57	0.1261
40	0.3	0.9	1	1	0.03	0.04	0.4	0.8	10	1	786.21	0.119
40	0.8	0.99	1	1	0.03	0.04	0.4	0.9	10	1	3129.7	0.08181
40	0.1	0.9	1	1	0.03	0.04	0.4	0.5	10	1	764.16	0.13147
40	0.3	0.9	1	1	0.03	0.04	0.4	0	10	1	831.64	0.13758
40	0.1	0.9	1	1	0.03	0.04	0.4	0.4	10	1	770.02	0.13429
40	0.1	0.9	1	1	0.03	0.04	0.4	0.2	10	1	784.2	0.14019
40	0.01	0.9	1	1	0.03	0.04	0.4	0.8	10	1	730.48	0.12333
40	0.9	0.99	1	1	0.03	0.04	0.4	0.2	10	1	3769.4	0.07188
40	0.1	0.8	1	1	0.03	0.04	0.4	0.5	10	1	467.33	0.09339
40	0.01	0.9	1	1	0.03	0.04	0.4	0.7	10	1	744.79	0.12955
40	0.1	0.8	1	1	0.03	0.04	0.4	0.6	10	1	461.43	0.09115
40	0.1	0.8	1	1	0.03	0.04	0.4	0.4	10	1	461.17	0.09272
40	0.2	0.9	1	1	0.03	0.04	0.4	0.6	10	1	795.2	0.12936
40	0.9	0.99	1	1	0.03	0.04	0.4	0.3	10	1	3630.8	0.06881
40	0.99	0.3	1	1	0.03	0.04	0.4	0	10	1	2395.9	0.00021
40	0.01	0.7	1	1	0.03	0.04	0.4	0.7	10	1	333.46	0.06825
40	0.99	0.3	1	1	0.03	0.04	0.4	0.1	10	1	2433.6	0.00035
40	0.01	0.9	1	1	0.03	0.04	0.4	0.3	10	1	763.09	0.13882
40	0.01	0.9	1	1	0.03	0.04	0.4	0.2	10	1	762.43	0.14216
40	0.4	0.9	1	1	0.03	0.04	0.4	0.6	10	1	823.72	0.1198
40	0.1	0.8	1	1	0.03	0.04	0.4	0.9	10	1	457.85	0.08901
40	0.01	0.9	1	1	0.03	0.04	0.4	0	10	1	771.99	0.14787
40	0.5	0.9	1	1	0.03	0.04	0.4	0.7	10	1	863.44	0.11292
40	0.4	0.7	1	1	0.03	0.04	0.4	0.2	10	1	391.61	0.05355
40	0.1	0.8	1	1	0.03	0.04	0.4	0	10	1	473.67	0.09751
40	0.4	0.9	1	1	0.03	0.04	0.4	0.5	10	1	840.07	0.12294
40	0.01	0.9	1	1	0.03	0.04	0.4	0.6	10	1	746.38	0.13104
40	0.4	0.9	1	1	0.03	0.04	0.4	0.7	10	1	820.07	0.11693
40	0.01	0.9	1	1	0.03	0.04	0.4	0.4	10	1	759.03	0.13701
40	0.5	0.9	1	1	0.03	0.04	0.4	0.3	10	1	881.86	0.12054
40	0.99	0.6	1	1	0.03	0.04	0.4	0	10	1	3347.6	0.00026
40	0.4	0.9	1	1	0.03	0.04	0.4	0.9	10	1	813.23	0.11304
40	0.4	0.9	1	1	0.03	0.04	0.4	0.4	10	1	846.49	0.12432
40	0.99	0.1	1	1	0.03	0.04	0.4	0.3	10	1	2172	0.00047
40	0.99	0.01	1	1	0.03	0.04	0.4	0	10	1	1907.3	0.00012
40	0.01	0.8	1	1	0.03	0.04	0.4	0.2	10	1	452.94	0.09721
40	0.01	0.8	1	1	0.03	0.04	0.4	0.5	10	1	447.2	0.09404
40	0.01	0.8	1	1	0.03	0.04	0.4	0.7	10	1	443.94	0.09167
40	0.99	0.3	1	1	0.03	0.04	0.4	0.4	10	1	2526.9	0.0004
40	0.5	0.9	1	1	0.03	0.04	0.4	0	10	1	891.87	0.12479
40	0.01	0.9	1	1	0.03	0.04	0.4	0.5	10	1	751.13	0.13412
40	0.6	0.99	1	1	0.03	0.04	0.4	0.7	10	1	2752.7	0.11435
40	0.99	0.01	1	1	0.03	0.04	0.4	0.7	10	1	2242.2	0.00149
40	0.8	0.99	1	1	0.03	0.04	0.4	0.7	10	1	3281.9	0.08987
40	0.99	0.3	1	1	0.03	0.04	0.4	0.8	10	1	2708.5	0.00124
40	0.01	0.8	1	1	0.03	0.04	0.4	0.1	10	1	464.05	0.09897
40	0.01	0.8	1	1	0.03	0.04	0.4	0.3	10	1	450.97	0.09535
40	0.01	0.8	1	1	0.03	0.04	0.4	0.4	10	1	458.29	0.09539
40	0.6	0.99	1	1	0.03	0.04	0.4	0.5	10	1	2870	0.12491
40	0.5	0.9	1	1	0.03	0.04	0.4	0.1	10	1	892.77	0.12425
40	0.99	0.6	1	1	0.03	0.04	0.4	0.1	10	1	3385.7	0.0003
40	0.99	0.4	1	1	0.03	0.04	0.4	0.2	10	1	2693.3	0.00034
40	0.3	0.9	1	1	0.03	0.04	0.4	0.3	10	1	821.98	0.13138
40	0.3	0.9	1	1	0.03	0.04	0.4	0.9	10	1	790.76	0.11773
40	0.1	0.8	1	1	0.03	0.04	0.4	0.8	10	1	455.47	0.089
40	0.1	0.8	1	1	0.03	0.04	0.4	0.7	10	1	460.1	0.09068
40	0.3	0.9	1	1	0.03	0.04	0.4	0.7	10	1	797.18	0.12185
40	0.8	0.99	1	1	0.03	0.04	0.4	0.8	10	1	3142	0.08319
40	0.99	0.6	1	1	0.03	0.04	0.4	0.6	10	1	3501.3	0.00076
40	0.01	0.99	1	1	0.03	0.04	0.4	0.7	10	1	1426.9	0.08859
40	0.3	0.9	1	1	0.03	0.04	0.4	0.5	10	1	818.08	0.12785
40	0.01	0.9	1	1	0.03	0.04	0.4	0.9	10	1	730.86	0.12225
40	0.7	0.99	1	1	0.03	0.04	0.4	0.7	10	1	2993.2	0.10528
40	0.2	0.9	1	1	0.03	0.04	0.4	0.9	10	1	762.46	0.11843
40	0.6	0.99	1	1	0.03	0.04	0.4	0.1	10	1	3108.6	0.1444
40	0.8	0.99	1	1	0.03	0.04	0.4	0.4	10	1	3447.9	0.09965
40	0.01	0.99	1	1	0.03	0.04	0.4	0.5	10	1	1617.9	0.11047
40	0.2	0.9	1	1	0.03	0.04	0.4	0.8	10	1	772.31	0.12325
40	0.8	0.99	1	1	0.03	0.04	0.4	0.3	10	1	3509.3	0.10308
40	0.5	0.99	1	1	0.03	0.04	0.4	0.8	10	1	2465.7	0.11386
40	0.4	0.9	1	1	0.03	0.04	0.4	0	10	1	867.39	0.13365
40	0.01	0.9	1	1	0.03	0.04	0.4	0.1	10	1	770.99	0.14542
40	0.5	0.99	1	1	0.03	0.04	0.4	0.1	10	1	2764.8	0.14751
40	0.4	0.9	1	1	0.03	0.04	0.4	0.1	10	1	867.41	0.13311
40	0.2	0.9	1	1	0.03	0.04	0.4	0.3	10	1	804.81	0.13676
40	0.99	0.2	1	1	0.03	0.04	0.4	0.4	10	1	2359.3	0.00069
40	0.2	0.9	1	1	0.03	0.04	0.4	0	10	1	809.91	0.14201
40	0.99	0.99	1	1	0.03	0.04	0.4	0.5	10	1	7976.6	0.02506
40	0.99	0.01	1	1	0.03	0.04	0.4	0.3	10	1	2009.6	0.00042
40	0.4	0.99	1	1	0.03	0.04	0.4	0.9	10	1	2237.8	0.10929
40	0.99	0.99	1	1	0.03	0.04	0.4	0.9	10	1	8047.6	0.02539
40	0.99	0.3	1	1	0.03	0.04	0.4	0.7	10	1	2654.7	0.00099
40	0.1	0.9	1	1	0.03	0.04	0.4	0.9	10	1	750.19	0.12145
40	0.1	0.9	1	1	0.03	0.04	0.4	0.3	10	1	778.14	0.1377
40	0.8	0.99	1	1	0.03	0.04	0.4	0.2	10	1	3574.9	0.1065
40	0.1	0.9	1	1	0.03	0.04	0.4	0.1	10	1	792.23	0.1437
40	0.1	0.9	1	1	0.03	0.04	0.4	0	10	1	796.86	0.14486
40	0.99	0.1	1	1	0.03	0.04	0.4	0.4	10	1	2188.4	0.00045
40	0.3	0.99	1	1	0.03	0.04	0.4	0.8	10	1	2082.1	0.11112
40	0.4	0.99	1	1	0.03	0.04	0.4	0.6	10	1	2352.8	0.12491
40	0.7	0.99	1	1	0.03	0.04	0.4	0.3	10	1	3235.2	0.12262
40	0.2	0.99	1	1	0.03	0.04	0.4	0.8	10	1	1904.9	0.10719
40	0.1	0.99	1	1	0.03	0.04	0.4	0.3	10	1	1983.1	0.14051
40	0.5	0.99	1	1	0.03	0.04	0.4	0.4	10	1	2660.5	0.13475
40	0.6	0.99	1	1	0.03	0.04	0.4	0	10	1	3106.8	0.14769
40	0.99	0.99	1	1	0.03	0.04	0.4	0.6	10	1	8020.8	0.02504
40	0.01	0.99	1	1	0.03	0.04	0.4	0.4	10	1	1694.6	0.12149
40	0.99	0.5	1	1	0.03	0.04	0.4	0.2	10	1	2975.8	0.00021
40	0.99	0.4	1	1	0.03	0.04	0.4	0.9	10	1	2967.1	0.00143
40	0.4	0.99	1	1	0.03	0.04	0.4	0.3	10	1	2504.2	0.14226
40	0.4	0.99	1	1	0.03	0.04	0.4	0.7	10	1	2343.8	0.12047
40	0.7	0.99	1	1	0.03	0.04	0.4	0.1	10	1	3319.9	0.13005
40	0.4	0.99	1	1	0.03	0.04	0.4	0.4	10	1	2440	0.13666
40	0.1	0.99	1	1	0.03	0.04	0.4	0.8	10	1	1701.3	0.09866
40	0.3	0.99	1	1	0.03	0.04	0.4	0.1	10	1	2398.1	0.15548
40	0.99	0.1	1	1	0.03	0.04	0.4	0.7	10	1	2370	0.00121
40	0.2	0.99	1	1	0.03	0.04	0.4	0.3	10	1	2128.9	0.14127
40	0.99	0.1	1	1	0.03	0.04	0.4	0.5	10	1	2255.7	0.00075
40	0.99	0.6	1	1	0.03	0.04	0.4	0.2	10	1	3393	0.0004
40	0.5	0.99	1	1	0.03	0.04	0.4	0.6	10	1	2611	0.12494
40	0.6	0.99	1	1	0.03	0.04	0.4	0.2	10	1	2983.4	0.13659
40	0.99	0.6	1	1	0.03	0.04	0.4	0.8	10	1	3586.5	0.0013
40	0.6	0.99	1	1	0.03	0.04	0.4	0.3	10	1	2962.8	0.13253
40	0.2	0.99	1	1	0.03	0.04	0.4	0.4	10	1	2099.7	0.13659
40	0.3	0.99	1	1	0.03	0.04	0.4	0.2	10	1	2363.2	0.14927
40	0.01	0.99	1	1	0.03	0.04	0.4	0.2	10	1	1843.6	0.14248
40	0.4	0.99	1	1	0.03	0.04	0.4	0	10	1	2616.9	0.1591
40	0.01	0.99	1	1	0.03	0.04	0.4	0.9	10	1	1198.7	0.06731
40	0.99	0.3	1	1	0.03	0.04	0.4	0.3	10	1	2487.3	0.0004
40	0.8	0.99	1	1	0.03	0.04	0.4	0	10	1	3731.6	0.11556
40	0.7	0.99	1	1	0.03	0.04	0.4	0.8	10	1	2937.6	0.10111
40	0.7	0.99	1	1	0.03	0.04	0.4	0.5	10	1	3166.7	0.11606
40	0.99	0.99	1	1	0.03	0.04	0.4	0.1	10	1	8068	0.02483
40	0.8	0.99	1	1	0.03	0.04	0.4	0.1	10	1	3678.4	0.11163
40	0.2	0.99	1	1	0.03	0.04	0.4	0	10	1	2256.4	0.16231
40	0.99	0.6	1	1	0.03	0.04	0.4	0.5	10	1	3465	0.00058
40	0.01	0.99	1	1	0.03	0.04	0.4	0.8	10	1	1287.9	0.07646
40	0.99	0.7	1	1	0.03	0.04	0.4	0.6	10	1	4046.6	0.001
40	0.99	0.9	1	1	0.03	0.04	0.4	0	10	1	6131.5	0.00357
40	0.01	0.99	1	1	0.03	0.04	0.4	0	10	1	2017.4	0.16676
40	0.99	0.1	1	1	0.03	0.04	0.4	0	10	1	2030.2	0.00014
40	0.5	0.99	1	1	0.03	0.04	0.4	0	10	1	2832.4	0.15418
40	0.99	0.7	1	1	0.03	0.04	0.4	0.1	10	1	3906	0.00047
40	0.99	0.1	1	1	0.03	0.04	0.4	0.1	10	1	2067.1	0.00018
40	0.99	0.99	1	1	0.03	0.04	0.4	0.2	10	1	7991.9	0.02489
40	0.99	0.99	1	1	0.03	0.04	0.4	0	10	1	7946.1	0.0245
40	0.99	0.7	1	1	0.03	0.04	0.4	0	10	1	3876.7	0.00047
40	0.2	0.99	1	1	0.03	0.04	0.4	0.5	10	1	2056.6	0.12826
40	0.1	0.99	1	1	0.03	0.04	0.4	0.4	10	1	1908.6	0.13095
40	0.6	0.99	1	1	0.03	0.04	0.4	0.6	10	1	2797.4	0.11952
40	0.99	0.6	1	1	0.03	0.04	0.4	0.4	10	1	3428.5	0.0005
40	0.99	0.2	1	1	0.03	0.04	0.4	0	10	1	2224.8	0.00017
40	0.99	0.7	1	1	0.03	0.04	0.4	0.7	10	1	4040.4	0.00113
40	0.01	0.99	1	1	0.03	0.04	0.4	0.6	10	1	1485.9	0.09697
40	0.6	0.99	1	1	0.03	0.04	0.4	0.9	10	1	2584.4	0.10421
40	0.99	0.2	1	1	0.03	0.04	0.4	0.1	10	1	2234	0.00019
40	0.99	0.2	1	1	0.03	0.04	0.4	0.2	10	1	2269.1	0.00027
40	0.99	0.99	1	1	0.03	0.04	0.4	0.8	10	1	7966.8	0.02421
40	0.99	0.2	1	1	0.03	0.04	0.4	0.3	10	1	2307.3	0.00043
40	0.99	0.6	1	1	0.03	0.04	0.4	0.7	10	1	3541.4	0.00099
40	0.5	0.99	1	1	0.03	0.04	0.4	0.9	10	1	2411.2	0.10865
40	0.1	0.99	1	1	0.03	0.04	0.4	0.9	10	1	1642	0.09073
40	0.99	0.1	1	1	0.03	0.04	0.4	0.9	10	1	2485.9	0.00191
40	0.99	0.01	1	1	0.03	0.04	0.4	0.8	10	1	2308.9	0.00172
40	0.2	0.99	1	1	0.03	0.04	0.4	0.1	10	1	2221.6	0.15572
40	0.99	0.8	1	1	0.03	0.04	0.4	0.1	10	1	4751.5	0.00098
40	0.99	0.7	1	1	0.03	0.04	0.4	0.8	10	1	4133.5	0.00154
40	0.2	0.99	1	1	0.03	0.04	0.4	0.9	10	1	1861.2	0.10055
40	0.99	0.8	1	1	0.03	0.04	0.4	0.6	10	1	4892	0.00184
40	0.99	0.5	1	1	0.03	0.04	0.4	0.1	10	1	2962.2	0.00023
40	0.2	0.99	1	1	0.03	0.04	0.4	0.6	10	1	2020.8	0.1217
40	0.99	0.8	1	1	0.03	0.04	0.4	0.3	10	1	4800.8	0.00117
40	0.01	0.99	1	1	0.03	0.04	0.4	0.1	10	1	1942.8	0.1552
40	0.99	0.5	1	1	0.03	0.04	0.4	0.9	10	1	3216.1	0.00119
40	0.99	0.01	1	1	0.03	0.04	0.4	0.9	10	1	2401.2	0.0028
40	0.99	0.8	1	1	0.03	0.04	0.4	0.8	10	1	4937.5	0.00239
40	0.01	0.99	1	1	0.03	0.04	0.4	0.3	10	1	1753.5	0.13075
40	0.99	0.7	1	1	0.03	0.04	0.4	0.3	10	1	3962.7	0.00061
40	0.1	0.99	1	1	0.03	0.04	0.4	0.7	10	1	1803.2	0.1089
40	0.9	0.99	1	1	0.03	0.04	0.4	0.9	10	1	3288	0.0555
40	0.9	0.99	1	1	0.03	0.04	0.4	0.7	10	1	3414.7	0.05974
40	0.99	0.8	1	1	0.03	0.04	0.4	0.7	10	1	4960.6	0.00195
40	0.3	0.99	1	1	0.03	0.04	0.4	0.7	10	1	2135.2	0.11804
40	0.1	0.99	1	1	0.03	0.04	0.4	0.6	10	1	1823.5	0.11545
40	0.99	0.9	1	1	0.03	0.04	0.4	0.2	10	1	6183.8	0.00389
40	0.99	0.99	1	1	0.03	0.04	0.4	0.7	10	1	7903.4	0.02513
40	0.99	0.4	1	1	0.03	0.04	0.4	0.3	10	1	2738.6	0.00044
40	0.99	0.2	1	1	0.03	0.04	0.4	0.7	10	1	2483	0.00113
40	0.99	0.2	1	1	0.03	0.04	0.4	0.5	10	1	2394.6	0.00057
40	0.1	0.99	1	1	0.03	0.04	0.4	0.5	10	1	1871	0.1231
40	0.99	0.2	1	1	0.03	0.04	0.4	0.8	10	1	2561	0.00141
40	0.9	0.99	1	1	0.03	0.04	0.4	0.6	10	1	3549.3	0.0634
40	0.99	0.8	1	1	0.03	0.04	0.4	0.9	10	1	4971.2	0.00273
40	0.99	0.3	1	1	0.03	0.04	0.4	0.2	10	1	2467	0.0004
40	0.4	0.99	1	1	0.03	0.04	0.4	0.8	10	1	2250	0.11357
40	0.99	0.1	1	1	0.03	0.04	0.4	0.8	10	1	2410.6	0.002
40	0.3	0.99	1	1	0.03	0.04	0.4	0.9	10	1	2055.3	0.10604
40	0.2	0.99	1	1	0.03	0.04	0.4	0.7	10	1	1960.4	0.11417
40	0.99	0.8	1	1	0.03	0.04	0.4	0.4	10	1	4810	0.00124
40	0.99	0.9	1	1	0.03	0.04	0.4	0.1	10	1	6170.1	0.00378
40	0.99	0.3	1	1	0.03	0.04	0.4	0.9	10	1	2760.8	0.0016
40	0.5	0.99	1	1	0.03	0.04	0.4	0.7	10	1	2512.2	0.11865
40	0.3	0.99	1	1	0.03	0.04	0.4	0.3	10	1	2312.6	0.14279
40	0.1	0.99	1	1	0.03	0.04	0.4	0	10	1	2120.3	0.16548
40	0.99	0.9	1	1	0.03	0.04	0.4	0.3	10	1	6143.3	0.00472
40	0.99	0.2	1	1	0.03	0.04	0.4	0.6	10	1	2447.9	0.00092
40	0.99	0.9	1	1	0.03	0.04	0.4	0.6	10	1	6312.6	0.00605
40	0.99	0.4	1	1	0.03	0.04	0.4	0	10	1	2631.5	0.00016
40	0.1	0.99	1	1	0.03	0.04	0.4	0.2	10	1	2023	0.1471
40	0.99	0.2	1	1	0.03	0.04	0.4	0.9	10	1	2614.8	0.00174
40	0.99	0.3	1	1	0.03	0.04	0.4	0.5	10	1	2560.9	0.00057
40	0.7	0.99	1	1	0.03	0.04	0.4	0.2	10	1	3274.7	0.12614
40	0.1	0.99	1	1	0.03	0.04	0.4	0.1	10	1	2076.9	0.15714
40	0.7	0.99	1	1	0.03	0.04	0.4	0.9	10	1	2960.1	0.09954
40	0.7	0.99	1	1	0.03	0.04	0.4	0	10	1	3424.4	0.13594
40	0.9	0.99	1	1	0.03	0.04	0.4	0.1	10	1	3764.3	0.07361
40	0.99	0.4	1	1	0.03	0.04	0.4	0.1	10	1	2669.4	0.00019
40	0.3	0.99	1	1	0.03	0.04	0.4	0.5	10	1	2222.1	0.12889
40	0.99	0.7	1	1	0.03	0.04	0.4	0.2	10	1	3946.2	0.00039
40	0.3	0.99	1	1	0.03	0.04	0.4	0.6	10	1	2181.2	0.12418
40	0.4	0.99	1	1	0.03	0.04	0.4	0.5	10	1	2447.8	0.13306
40	0.99	0.3	1	1	0.03	0.04	0.4	0.6	10	1	2625.2	0.00079
40	0.9	0.99	1	1	0.03	0.04	0.4	0	10	1	3832.9	0.07665
40	0.6	0.99	1	1	0.03	0.04	0.4	0.8	10	1	2682.1	0.10941
40	0.7	0.99	1	1	0.03	0.04	0.4	0.6	10	1	3065	0.11033
40	0.5	0.99	1	1	0.03	0.04	0.4	0.5	10	1	2599.6	0.12838
40	0.99	0.9	1	1	0.03	0.04	0.4	0.8	10	1	6397.4	0.00723
40	0.5	0.99	1	1	0.03	0.04	0.4	0.3	10	1	2715.3	0.14008
40	0.5	0.99	1	1	0.03	0.04	0.4	0.2	10	1	2754	0.14459
40	0.3	0.99	1	1	0.03	0.04	0.4	0.4	10	1	2293.8	0.13798
40	0.2	0.99	1	1	0.03	0.04	0.4	0.2	10	1	2211.3	0.15111
40	0.99	0.8	1	1	0.03	0.04	0.4	0.2	10	1	4723.7	0.00116
40	0.99	0.4	1	1	0.03	0.04	0.4	0.6	10	1	2816.9	0.00073
40	0.3	0.99	1	1	0.03	0.04	0.4	0	10	1	2429	0.16177
40	0.7	0.99	1	1	0.03	0.04	0.4	0.4	10	1	3189.8	0.11878
40	0.8	0.99	1	1	0.03	0.04	0.4	0.6	10	1	3396.7	0.09457
40	0.99	0.4	1	1	0.03	0.04	0.4	0.8	10	1	2908.3	0.00139
40	0.8	0.99	1	1	0.03	0.04	0.4	0.5	10	1	3435.5	0.0977
40	0.99	0.4	1	1	0.03	0.04	0.4	0.4	10	1	2773.4	0.00044
40	0.99	0.4	1	1	0.03	0.04	0.4	0.5	10	1	2807.2	0.00056
40	0.99	0.5	1	1	0.03	0.04	0.4	0	10	1	2917	0.00016
40	0.6	0.99	1	1	0.03	0.04	0.4	0.4	10	1	2893.9	0.12759
40	0.99	0.5	1	1	0.03	0.04	0.4	0.4	10	1	3021.9	0.00052
40	0.99	0.4	1	1	0.03	0.04	0.4	0.7	10	1	2864.1	0.00077
40	0.99	0.5	1	1	0.03	0.04	0.4	0.7	10	1	3168.5	0.00069
40	0.99	0.5	1	1	0.03	0.04	0.4	0.8	10	1	3197.1	0.00094
40	0.99	0.6	1	1	0.03	0.04	0.4	0.3	10	1	3424.1	0.0004
40	0.99	0.6	1	1	0.03	0.04	0.4	0.9	10	1	3576.8	0.0011
40	0.4	0.99	1	1	0.03	0.04	0.4	0.2	10	1	2537.5	0.14767
40	0.4	0.99	1	1	0.03	0.04	0.4	0.1	10	1	2571.2	0.15314
40	0.99	0.7	1	1	0.03	0.04	0.4	0.5	10	1	3981	0.00102
40	0.99	0.7	1	1	0.03	0.04	0.4	0.4	10	1	4011.8	0.0006
40	0.99	0.5	1	1	0.03	0.04	0.4	0.5	10	1	3067.8	0.00063
40	0.99	0.7	1	1	0.03	0.04	0.4	0.9	10	1	4146.4	0.00183
40	0.99	0.5	1	1	0.03	0.04	0.4	0.6	10	1	3115	0.00063
40	0.99	0.5	1	1	0.03	0.04	0.4	0.3	10	1	3015.4	0.00048
40	0.99	0.9	1	1	0.03	0.04	0.4	0.7	10	1	6324.3	0.00681
40	0.99	0.99	1	1	0.03	0.04	0.4	0.4	10	1	8030.9	0.02533
40	0.99	0.99	1	1	0.03	0.04	0.4	0.3	10	1	8099.5	0.02643
40	0.99	0.8	1	1	0.03	0.04	0.4	0	10	1	4692.6	0.00072
40	0.99	0.8	1	1	0.03	0.04	0.4	0.5	10	1	4885.7	0.00155
40	0.99	0.9	1	1	0.03	0.04	0.4	0.5	10	1	6202.7	0.00562
40	0.99	0.9	1	1	0.03	0.04	0.4	0.9	10	1	6418.1	0.00822
40	0.99	0.9	1	1	0.03	0.04	0.4	0.4	10	1	6182.7	0.00486
